# Supplementary material
Source: publisher figshare collection journal article supplement (https://gsajournals.figshare.com/ndownloader/files/13082591)
Supplement: Supplementary file 1 [file 13082591]

## Sheet: Figure1
PANEL A
Total people:		831667000
Singletons:		356177000
Ped. Members w/YoB		439361000
Ped. Members w/o YoB		36128000
Biggest pedigree:		439323000
Other pedigrees:		36166000
PANELS B, E, F, G, H, I
Birth decade	Total	Male*	Female*	with death	with child	with spouse	with both parents	all 4**	place-of-birth	place-of-death	both places***	born in Europe	born in USA
1650	587000	316000	270000	364000	292000	358000	316000	98000	477000	308000	276000	387000	79000
1660	669000	358000	310000	415000	327000	401000	374000	116000	549000	350000	316000	439000	95000
1670	762000	403000	358000	471000	369000	453000	437000	135000	629000	397000	360000	493000	113000
1680	870000	457000	412000	541000	417000	511000	512000	160000	724000	454000	415000	567000	131000
1690	948000	500000	446000	588000	450000	552000	571000	179000	794000	493000	455000	614000	149000
1700	1163000	609000	552000	713000	554000	679000	700000	219000	974000	597000	552000	740000	195000
1710	1243000	647000	594000	768000	586000	718000	768000	241000	1045000	639000	592000	776000	224000
1720	1472000	767000	702000	909000	697000	853000	907000	286000	1234000	757000	702000	889000	290000
1730	1694000	881000	810000	1050000	797000	974000	1066000	337000	1423000	875000	813000	995000	365000
1740	1902000	990000	908000	1192000	903000	1098000	1201000	389000	1594000	991000	922000	1072000	451000
1750	2283000	1198000	1082000	1450000	1115000	1345000	1433000	486000	1909000	1213000	1127000	1240000	583000
1760	2636000	1364000	1268000	1688000	1311000	1572000	1668000	587000	2208000	1412000	1313000	1406000	706000
1770	3151000	1625000	1522000	2027000	1618000	1923000	1964000	719000	2656000	1705000	1595000	1664000	881000
1780	3787000	1935000	1848000	2471000	2006000	2368000	2350000	907000	3239000	2091000	1974000	1994000	1110000
1790	4795000	2457000	2333000	3191000	2662000	3118000	2947000	1218000	4178000	2730000	2603000	2522000	1475000
1800	6000000	3057000	2937000	3996000	3464000	4043000	3605000	1563000	5295000	3445000	3306000	3067000	2001000
1810	7439000	3778000	3654000	4972000	4399000	5113000	4477000	2012000	6679000	4310000	4162000	3803000	2583000
1820	9783000	4938000	4833000	6330000	5658000	6573000	6065000	2656000	8891000	5511000	5346000	4980000	3486000
1830	12704000	6299000	6387000	7797000	6838000	7962000	8382000	3383000	11682000	6785000	6604000	6128000	4928000
1840	16034000	7919000	8088000	9453000	8210000	9558000	10994000	4189000	14877000	8215000	8021000	7103000	6843000
1850	19588000	9696000	9857000	11359000	9884000	11507000	13634000	5140000	18302000	9892000	9673000	7827000	9127000
1860	23673000	11695000	11941000	13333000	11313000	13320000	16834000	6015000	22344000	11626000	11385000	8910000	11558000
1870	28810000	14198000	14563000	16108000	13032000	15733000	21096000	7276000	27363000	14052000	13770000	9773000	15287000
1880	30835000	15245000	15526000	18343000	13834000	17145000	22674000	8203000	29186000	16215000	15836000	9845000	16602000
1890	34679000	17047000	17549000	20785000	13935000	17829000	26723000	9065000	32891000	18620000	18158000	8963000	21134000
1900	35034000	17263000	17675000	21898000	13397000	17865000	27524000	9138000	32842000	19945000	19263000	7438000	22599000
1910	33408000	16589000	16721000	22195000	12851000	17159000	26560000	8963000	30743000	20222000	19237000	3896000	24288000
1920	31112000	15622000	15433000	18277000	12129000	15500000	24990000	7080000	27579000	16560000	15453000	2951000	22709000
1930	23715000	12006000	11666000	9021000	9960000	11989000	18354000	3252000	20754000	8117000	7525000	2135000	17185000
1940	19861000	10229000	9601000	4420000	10519000	12378000	13451000	1357000	14880000	3933000	3443000	2079000	11174000
* Note: for some persons, gender was un-specified, so Total > Male + Female.
** "all 4" includes death, child, spouse, and both parents.
*** both place-of-birth and place-of-death
PANEL C
Year of birth	Total	all 4*
1650	115000	15000
1651	43000	8000
1652	49000	9000
1653	47000	8000
1654	51000	9000
1655	76000	12000
1656	52000	9000
1657	51000	9000
1658	54000	10000
1659	49000	9000
1660	113000	16000
1661	51000	9000
1662	57000	10000
1663	57000	10000
1664	59000	11000
1665	88000	14000
1666	60000	11000
1667	59000	11000
1668	64000	12000
1669	60000	11000
1670	126000	19000
1671	61000	12000
1672	70000	13000
1673	66000	12000
1674	66000	12000
1675	100000	16000
1676	66000	12000
1677	68000	13000
1678	72000	13000
1679	67000	13000
1680	142000	21000
1681	69000	13000
1682	79000	15000
1683	76000	15000
1684	77000	15000
1685	106000	18000
1686	80000	15000
1687	79000	15000
1688	83000	16000
1689	78000	15000
1690	142000	22000
1691	75000	15000
1692	84000	16000
1693	80000	16000
1694	80000	16000
1695	119000	21000
1696	92000	18000
1697	88000	18000
1698	98000	19000
1699	90000	18000
1700	206000	30000
1701	97000	20000
1702	107000	21000
1703	100000	20000
1704	105000	21000
1705	130000	23000
1706	104000	21000
1707	104000	21000
1708	110000	22000
1709	101000	20000
1710	167000	27000
1711	106000	22000
1712	118000	24000
1713	108000	22000
1714	113000	23000
1715	150000	27000
1716	119000	24000
1717	117000	24000
1718	128000	25000
1719	118000	24000
1720	211000	34000
1721	122000	25000
1722	135000	27000
1723	133000	27000
1724	137000	28000
1725	185000	33000
1726	138000	28000
1727	137000	28000
1728	140000	28000
1729	134000	28000
1730	237000	40000
1731	143000	30000
1732	158000	32000
1733	149000	31000
1734	160000	33000
1735	203000	38000
1736	160000	33000
1737	157000	32000
1738	167000	34000
1739	161000	34000
1740	266000	45000
1741	154000	32000
1742	170000	36000
1743	169000	36000
1744	179000	39000
1745	229000	44000
1746	179000	38000
1747	180000	38000
1748	191000	40000
1749	184000	40000
1750	345000	58000
1751	187000	41000
1752	205000	45000
1753	203000	46000
1754	213000	48000
1755	269000	54000
1756	222000	49000
1757	208000	47000
1758	218000	48000
1759	214000	49000
1760	361000	66000
1761	226000	52000
1762	237000	54000
1763	232000	54000
1764	245000	57000
1765	319000	67000
1766	256000	59000
1767	247000	58000
1768	258000	60000
1769	254000	60000
1770	408000	77000
1771	275000	64000
1772	273000	65000
1773	267000	64000
1774	294000	71000
1775	392000	81000
1776	325000	76000
1777	300000	73000
1778	313000	75000
1779	303000	74000
1780	491000	95000
1781	345000	81000
1782	326000	80000
1783	323000	80000
1784	344000	86000
1785	435000	99000
1786	397000	98000
1787	366000	94000
1788	382000	96000
1789	376000	97000
1790	562000	118000
1791	456000	113000
1792	427000	111000
1793	421000	111000
1794	436000	115000
1795	528000	127000
1796	515000	132000
1797	469000	127000
1798	498000	133000
1799	483000	131000
1800	762000	156000
1801	569000	145000
1802	534000	145000
1803	536000	147000
1804	557000	152000
1805	652000	165000
1806	627000	166000
1807	579000	159000
1808	598000	164000
1809	585000	163000
1810	804000	190000
1811	725000	191000
1812	686000	188000
1813	655000	181000
1814	678000	189000
1815	829000	212000
1816	785000	214000
1817	727000	205000
1818	785000	223000
1819	766000	220000
1820	1031000	247000
1821	903000	243000
1822	882000	248000
1823	883000	247000
1824	919000	259000
1825	1068000	275000
1826	1040000	280000
1827	995000	280000
1828	1037000	288000
1829	1025000	287000
1830	1265000	308000
1831	1122000	302000
1832	1183000	324000
1833	1197000	331000
1834	1229000	334000
1835	1364000	346000
1836	1316000	354000
1837	1310000	355000
1838	1378000	369000
1839	1341000	360000
1840	1644000	394000
1841	1433000	373000
1842	1520000	402000
1843	1495000	394000
1844	1580000	424000
1845	1696000	429000
1846	1606000	425000
1847	1611000	430000
1848	1705000	455000
1849	1745000	464000
1850	2043000	481000
1851	1672000	450000
1852	1785000	481000
1853	1768000	478000
1854	1880000	511000
1855	1979000	511000
1856	2018000	544000
1857	2059000	546000
1858	2157000	566000
1859	2226000	573000
1860	2482000	587000
1861	2181000	584000
1862	2221000	573000
1863	2148000	553000
1864	2221000	564000
1865	2349000	584000
1866	2396000	617000
1867	2466000	635000
1868	2587000	652000
1869	2621000	667000
1870	2924000	683000
1871	2526000	647000
1872	2749000	709000
1873	2713000	700000
1874	2816000	722000
1875	2946000	741000
1876	2953000	762000
1877	2916000	747000
1878	3071000	779000
1879	3196000	785000
1880	3212000	778000
1881	2796000	759000
1882	2927000	787000
1883	2896000	788000
1884	3036000	831000
1885	3135000	825000
1886	3146000	847000
1887	3133000	832000
1888	3298000	882000
1889	3256000	874000
1890	3552000	871000
1891	3262000	878000
1892	3451000	931000
1893	3375000	909000
1894	3446000	919000
1895	3524000	924000
1896	3539000	938000
1897	3437000	892000
1898	3614000	928000
1899	3477000	876000
1900	3705000	899000
1901	3150000	853000
1902	3323000	892000
1903	3333000	896000
1904	3440000	907000
1905	3516000	921000
1906	3556000	929000
1907	3590000	942000
1908	3759000	960000
1909	3662000	939000
1910	3913000	940000
1911	3229000	899000
1912	3283000	923000
1913	3243000	912000
1914	3332000	924000
1915	3356000	907000
1916	3263000	888000
1917	3218000	866000
1918	3318000	873000
1919	3252000	831000
1920	3597000	870000
1921	3242000	852000
1922	3170000	789000
1923	3095000	756000
1924	3147000	741000
1925	3175000	702000
1926	2992000	653000
1927	2967000	621000
1928	2936000	575000
1929	2791000	521000
1930	2863000	485000
1931	2342000	420000
1932	2363000	392000
1933	2224000	344000
1934	2241000	326000
1935	2325000	302000
1936	2260000	276000
1937	2216000	249000
1938	2294000	237000
1939	2588000	222000
1940	1978000	185000
1941	1721000	168000
1942	1904000	166000
1943	1896000	154000
1944	1848000	133000
1945	1878000	116000
1946	2074000	120000
1947	2287000	121000
1948	2176000	103000
1949	2099000	92000
* "all 4" includes death, child, spouse, and both parents.
PANEL D
log2 enrichment for rounded birth years:
Era	Total	all 4*
1650	0.94987	0.64569
1660	0.78515	0.52529
1670	0.75684	0.46939
1680	0.67206	0.39911
1690	0.59916	0.333
1700	0.7022	0.35717
1710	0.45332	0.21917
1720	0.56031	0.27994
1730	0.4896	0.25147
1740	0.49567	0.25069
1750	0.55559	0.27541
1760	0.47728	0.22399
1770	0.4454	0.17401
1780	0.37266	0.11938
1790	0.23573	0.01038
1800	0.30314	0.04963
1810	0.16963	-0.0004
1820	0.12742	-0.03127
1830	0.06206	-0.06178
1840	0.07355	-0.03207
1850	0.04766	-0.06329
1860	0.03657	-0.04809
1870	0.03361	-0.03862
1880	0.05189	-0.04156
1890	0.03624	-0.01842
1900	0.05433	-0.00762
1910	0.15362	0.05411
1920	0.15421	0.1913
1930	0.16339	0.35398
1940	-0.05334	0.1902
* "all 4" includes death, child, spouse, and both parents.

## Sheet: Figure3
Note: tables include the decades before & after those plotted, required for extending the lines to the edges of each panel.
PANEL A	Siblings' lifespan correlations (born within 10y; SE=standard error)
Birth decade	corr.(MM)	SE(MM)	corr.(FF)	SE(FF)	corr.(FM)	SE(FM)	corr.(MF)	SE(MF)
1790	0.09909	0.00199	0.11079	0.00265	0.06979	0.00235	0.07293	0.00234
1800	0.09606	0.00169	0.10986	0.00224	0.07496	0.00198	0.07061	0.00198
1810	0.09443	0.00147	0.10747	0.00192	0.07156	0.00171	0.07098	0.00171
1820	0.09888	0.00128	0.10501	0.00163	0.06937	0.00147	0.06816	0.00147
1830	0.10188	0.00116	0.10114	0.0014	0.06758	0.00128	0.06776	0.00129
1840	0.09826	0.00106	0.09659	0.00123	0.06831	0.00116	0.0702	0.00115
1850	0.10168	0.00096	0.09258	0.00113	0.06675	0.00106	0.0697	0.00105
1860	0.09866	0.00089	0.0921	0.00103	0.06562	0.00097	0.06358	0.00097
1870	0.09876	0.00081	0.09316	0.00092	0.06522	0.00088	0.06366	0.00087
1880	0.10355	0.00076	0.0907	0.00085	0.06631	0.00081	0.0623	0.00081
1890	0.11125	0.00073	0.09236	0.0008	0.06822	0.00077	0.06898	0.00077
1900	0.12243	0.00075	0.09388	0.00081	0.07717	0.00079	0.07566	0.00079
1910	0.12982	0.00078	0.09172	0.00082	0.08203	0.00081	0.08284	0.00081
1920	0.10962	0.0009	0.09116	0.00099	0.0685	0.00097	0.07984	0.00094
PANEL B	1st cousins' lifespan correlations (born within 10y; SE=standard error)
Birth decade	corr.(MM)	SE(MM)	corr.(FF)	SE(FF)	corr.(FM)	SE(FM)	corr.(MF)	SE(MF)
1790	0.03226	0.00161	0.04106	0.002	0.02987	0.0018	0.0273	0.0018
1800	0.03453	0.00137	0.03816	0.00169	0.02971	0.00152	0.02888	0.00153
1810	0.03125	0.00119	0.0374	0.00146	0.02909	0.00131	0.0288	0.00132
1820	0.03387	0.00103	0.033	0.00124	0.02699	0.00113	0.02799	0.00114
1830	0.03528	0.00092	0.02848	0.00106	0.02491	0.00098	0.02419	0.001
1840	0.02874	0.00083	0.02338	0.00093	0.02134	0.00088	0.0201	0.00088
1850	0.02855	0.00074	0.02135	0.00083	0.01916	0.00079	0.01875	0.00079
1860	0.02478	0.00068	0.02158	0.00075	0.01611	0.00071	0.01643	0.00072
1870	0.02264	0.00061	0.02178	0.00068	0.0148	0.00064	0.01512	0.00065
1880	0.02741	0.00058	0.02393	0.00062	0.01578	0.0006	0.01547	0.0006
1890	0.02922	0.00055	0.02554	0.00059	0.01898	0.00057	0.01897	0.00057
1900	0.03187	0.00055	0.0266	0.00059	0.02278	0.00057	0.02316	0.00057
1910	0.0359	0.00056	0.02559	0.00059	0.02364	0.00057	0.02576	0.00057
1920	0.03117	0.00062	0.02965	0.00068	0.02212	0.00066	0.02576	0.00064
PANEL C	Spouses' lifespan correlations (born within 10y; SE=standard error) (sibling data from panel A)
Birth decade	corr.(FM)	SE(FM)	corr.(MF)	SE(MF)	(only "FM" used in this plot)
1790	0.14236	0.00144	0.12839	0.00231	("MF" used in calculations for Fig 4I)
1800	0.13028	0.00123	0.11582	0.00207
1810	0.12301	0.00108	0.10624	0.00188
1820	0.12093	0.00095	0.1088	0.00169
1830	0.11237	0.00086	0.10351	0.0016
1840	0.10524	0.00079	0.10089	0.00147
1850	0.10051	0.00072	0.09829	0.00138
1860	0.08938	0.00066	0.08945	0.00132
1870	0.0834	0.00061	0.08113	0.00123
1880	0.07636	0.00056	0.0726	0.00114
1890	0.08235	0.00053	0.07607	0.0011
1900	0.08704	0.00053	0.08078	0.00115
1910	0.09723	0.00053	0.09406	0.00117
1920	0.09981	0.00062	0.0981	0.00136
PANEL D	Siblings-in-law's lifespan correlations (born within 10y; SE=standard error)
Birth decade	corr.(MM)	SE(MM)	corr.(FF)	SE(FF)	corr.(FM)	SE(FM)	corr.(MF)	SE(MF)
1790	0.04362	0.00172	0.04407	0.00187	0.04184	0.00167	0.03901	0.00183
1800	0.04064	0.00146	0.04165	0.00157	0.04071	0.0014	0.03506	0.00156
1810	0.04159	0.00127	0.03961	0.00136	0.03891	0.00122	0.03369	0.00135
1820	0.04046	0.00109	0.03706	0.00117	0.03617	0.00105	0.0346	0.00118
1830	0.04132	0.00097	0.03248	0.00102	0.03304	0.00093	0.03143	0.00105
1840	0.03837	0.00089	0.02756	0.00092	0.02825	0.00085	0.02794	0.00095
1850	0.03536	0.00081	0.02752	0.00085	0.02705	0.00078	0.02625	0.00087
1860	0.03156	0.00075	0.02524	0.00078	0.02208	0.00072	0.02336	0.00081
1870	0.02913	0.00069	0.02336	0.00071	0.0195	0.00066	0.01889	0.00074
1880	0.02955	0.00064	0.02598	0.00066	0.01794	0.00061	0.01704	0.00069
1890	0.0277	0.00061	0.02694	0.00063	0.02063	0.00058	0.02141	0.00065
1900	0.02758	0.00063	0.02782	0.00064	0.02373	0.00059	0.0232	0.00067
1910	0.03173	0.00064	0.02844	0.00065	0.02757	0.00061	0.02833	0.00069
1920	0.03139	0.00074	0.03481	0.00079	0.02927	0.00072	0.03265	0.00081
PANEL E	1st-cousins-in-law's lifespan correlations (born within 10y; SE=standard error)
Birth decade	corr.(MM)	SE(MM)	corr.(FF)	SE(FF)	corr.(FM)	SE(FM)	corr.(MF)	SE(MF)
1790	0.02718	0.00137	0.02912	0.00148	0.0249	0.00139	0.02454	0.00144
1800	0.02682	0.00117	0.02803	0.00125	0.02482	0.00117	0.02311	0.00122
1810	0.02417	0.00101	0.02521	0.00107	0.02287	0.00101	0.02261	0.00106
1820	0.02642	0.00087	0.0224	0.00092	0.02133	0.00087	0.02064	0.00091
1830	0.0266	0.00077	0.01839	0.00081	0.01783	0.00077	0.01751	0.0008
1840	0.02072	0.00069	0.01506	0.00072	0.01453	0.00069	0.01319	0.00072
1850	0.02081	0.00062	0.01312	0.00065	0.01358	0.00062	0.0119	0.00065
1860	0.01657	0.00057	0.01248	0.00059	0.00967	0.00057	0.0104	0.00059
1870	0.01376	0.00052	0.0133	0.00054	0.00798	0.00052	0.0086	0.00054
1880	0.01559	0.00049	0.01362	0.0005	0.00793	0.00048	0.00747	0.0005
1890	0.01439	0.00047	0.01582	0.00047	0.0097	0.00046	0.0106	0.00048
1900	0.01417	0.00046	0.01582	0.00047	0.01187	0.00046	0.01237	0.00048
1910	0.0169	0.00047	0.01435	0.00047	0.01263	0.00046	0.01421	0.00048
1920	0.01607	0.00052	0.02191	0.00054	0.01335	0.00052	0.01824	0.00054
PANEL H	Relatives' mean lifespan correlations across decades 1800's-1920's (born within 10y; SD=standard dev. of correlations from the various decades)
Relative type	corr.(MM)	SD(MM)	corr.(FF)	SD(FF)	corr.(FM)	SD(FM)	corr.(MF)	SD(MF)
pib	0.04227	0.00486	0.038	0.00531	0.03244	0.00632	0.03189	0.00626
cuz1	0.0304	0.00387	0.02742	0.00548	0.02195	0.00471	0.02226	0.00486
cuz1r1	0.01901	0.00393	0.01781	0.00576	0.01451	0.00524	0.01464	0.00536
cuz2	0.00774	0.00181	0.00731	0.0027	0.00562	0.00227	0.00583	0.00225

## Sheet: Figure4
Note: tables include the decades before & after those plotted, required for extending the lines to the edges of each panel.
PANEL A	Sib-law-sib's lifespan correlations (born within 10y; SE=standard error)
Birth decade	corr.(MM)	SE(MM)	corr.(FF)	SE(FF)	corr.(FM)	SE(FM)	corr.(MF)	SE(MF)
1790	0.03017	0.00184	0.03355	0.00227	0.02904	0.00203	0.02856	0.00204
1800	0.03052	0.00154	0.0316	0.00191	0.03065	0.00171	0.02591	0.00172
1810	0.02882	0.00133	0.02902	0.00164	0.02862	0.00147	0.02694	0.00148
1820	0.03068	0.00115	0.0273	0.00139	0.02683	0.00125	0.02337	0.00127
1830	0.03263	0.00101	0.02254	0.00118	0.02338	0.00108	0.01947	0.0011
1840	0.02702	0.00092	0.01774	0.00104	0.01988	0.00098	0.01619	0.00098
1850	0.02383	0.00084	0.01388	0.00095	0.01678	0.00089	0.01407	0.00089
1860	0.02038	0.00078	0.01443	0.00087	0.01147	0.00082	0.01181	0.00083
1870	0.01768	0.00072	0.0143	0.00079	0.0104	0.00075	0.00912	0.00075
1880	0.0188	0.00067	0.01431	0.00072	0.0102	0.00069	0.00741	0.0007
1890	0.0175	0.00064	0.0181	0.00069	0.01094	0.00066	0.01211	0.00066
1900	0.01805	0.00067	0.01738	0.0007	0.01387	0.00068	0.01449	0.00068
1910	0.02015	0.0007	0.01805	0.00074	0.01734	0.00072	0.01652	0.00072
1920	0.01804	0.00085	0.02159	0.00092	0.01846	0.00089	0.02002	0.00087
PANEL B	Law-sib-law's lifespan correlations (born within 10y; SE=standard error)
Birth decade	corr.(MM)	SE(MM)	corr.(FF)	SE(FF)	corr.(FM)	SE(FM)	corr.(MF)	SE(MF)
1790	0.04559	0.00238	0.04031	0.00214	0.03614	0.00225	0.03193	0.00269
1800	0.04201	0.00201	0.03502	0.00179	0.03298	0.00187	0.03233	0.0023
1810	0.03763	0.00173	0.03689	0.00155	0.03073	0.00163	0.02842	0.00201
1820	0.04213	0.00147	0.03436	0.00135	0.0299	0.00141	0.02604	0.00175
1830	0.04439	0.0013	0.02898	0.0012	0.02555	0.00124	0.02399	0.00156
1840	0.03853	0.0012	0.02443	0.0011	0.02273	0.00114	0.0217	0.00142
1850	0.03705	0.00109	0.02313	0.00103	0.02171	0.00104	0.02394	0.00132
1860	0.03	0.00102	0.02132	0.00096	0.01915	0.00098	0.01895	0.00126
1870	0.0265	0.00094	0.0232	0.00089	0.01491	0.0009	0.01669	0.00116
1880	0.02914	0.00087	0.02555	0.00083	0.01408	0.00083	0.01645	0.00107
1890	0.02625	0.00083	0.02605	0.00079	0.017	0.00079	0.01695	0.00101
1900	0.02751	0.00085	0.02595	0.00081	0.01928	0.00081	0.01985	0.00105
1910	0.03035	0.00088	0.02469	0.00084	0.02091	0.00083	0.02196	0.00109
1920	0.02898	0.00104	0.03129	0.00104	0.02095	0.001	0.02615	0.0013
PANEL C	Siblings-in-law's lifespan correlations (born within 10y; SE=standard error)
(these data are re-produced from Figure 3, panel D)
PANEL E	Estimates of transferable variance (t^2), using data from panels A-C
Birth decade	t^2 (MM)	SE(MM)	t^2 (FF)	SE(FF)	t^2 (FM)	SE(FM)	t^2 (MF)	SE(MF)
1790	0.06034	0.00637	0.06331	0.00717	0.0698	0.00814	0.06508	0.00894
1800	0.05235	0.00489	0.06531	0.00672	0.06675	0.00665	0.05145	0.00639
1810	0.06632	0.00558	0.05805	0.00536	0.06699	0.00616	0.04995	0.00568
1820	0.05125	0.00356	0.05427	0.0046	0.05897	0.00493	0.06804	0.00713
1830	0.0487	0.00288	0.05246	0.00454	0.06036	0.00503	0.06645	0.00692
1840	0.05426	0.00333	0.04833	0.00455	0.04988	0.00438	0.06206	0.00665
1850	0.05009	0.00304	0.0649	0.00636	0.05434	0.00476	0.0537	0.00549
1860	0.05143	0.0034	0.0523	0.00487	0.04906	0.00515	0.05695	0.00651
1870	0.05279	0.00359	0.03841	0.0033	0.04784	0.00531	0.04425	0.00567
1880	0.04712	0.00283	0.04798	0.00359	0.0402	0.00435	0.04059	0.00546
1890	0.04627	0.00287	0.04144	0.00263	0.0472	0.0043	0.04778	0.00465
1900	0.04227	0.00264	0.04776	0.0031	0.04996	0.0039	0.0434	0.00379
1910	0.05227	0.00301	0.05161	0.00344	0.05782	0.004	0.06268	0.00493
1920	0.0592	0.00427	0.06243	0.00419	0.06483	0.00523	0.06646	0.00525
PANEL F	Estimates of assortative mating coefficient (a), using data from panels A-C
Birth decade	a (MM)	SE(MM)	a (FF)	SE(FF)	a (FM)	SE(FM)	a (MF)	SE(MF)
1790	1.0451	0.06853	0.91457	0.06218	0.8637	0.06397	0.81862	0.07916
1800	1.0337	0.06192	0.84074	0.05349	0.81013	0.05392	0.92214	0.07746
1810	0.90486	0.05008	0.93131	0.05065	0.78975	0.04887	0.84346	0.06879
1820	1.0412	0.04611	0.92708	0.04698	0.82674	0.04596	0.75274	0.05683
1830	1.0744	0.04055	0.89214	0.04675	0.77345	0.04368	0.76334	0.05603
1840	1.0042	0.0391	0.88634	0.04993	0.80472	0.04718	0.77692	0.05748
1850	1.0477	0.03907	0.84065	0.04573	0.80268	0.04514	0.91202	0.05902
1860	0.9504	0.03959	0.84448	0.04659	0.86705	0.05278	0.81119	0.06109
1870	0.90945	0.03897	0.99306	0.04894	0.76427	0.05304	0.8836	0.07094
1880	0.98594	0.03663	0.98319	0.04066	0.78492	0.05388	0.96513	0.0741
1890	0.94745	0.03682	0.9671	0.03726	0.82415	0.04514	0.79198	0.05345
1900	0.99747	0.0386	0.93264	0.03627	0.81267	0.03984	0.85592	0.05192
1910	0.9563	0.034	0.86816	0.03593	0.75835	0.03463	0.77514	0.04299
1920	0.92295	0.03975	0.89901	0.0363	0.71581	0.0387	0.80097	0.04458
PANEL G	Estimates of inheritance coefficient (beta), using data from panels A-C
Birth decade	beta (MM)	SE(MM)	beta (FF)	SE(FF)	beta (FM)	SE(FM)	beta (MF)	SE(MF)
1790	0.41123	0.02006	0.44588	0.01843	0.4315	0.02058	0.44867	0.02123
1800	0.42971	0.01582	0.45394	0.01607	0.45603	0.01523	0.43847	0.02034
1810	0.42652	0.01463	0.43553	0.01593	0.45329	0.01422	0.46572	0.01592
1820	0.43096	0.01167	0.43719	0.01439	0.45061	0.0131	0.43899	0.01685
1830	0.43627	0.00956	0.42826	0.01542	0.44668	0.01324	0.41916	0.01873
1840	0.41916	0.01107	0.41302	0.01832	0.44159	0.01432	0.40379	0.02113
1850	0.40564	0.01188	0.37016	0.02528	0.41479	0.0168	0.3744	0.02457
1860	0.40688	0.01293	0.39363	0.02046	0.37291	0.02647	0.37367	0.02742
1870	0.39864	0.01403	0.39196	0.0188	0.38884	0.02501	0.35812	0.03426
1880	0.40021	0.01223	0.37267	0.01865	0.39913	0.02279	0.33275	0.04341
1890	0.40281	0.0125	0.41334	0.0121	0.3813	0.02163	0.39734	0.0199
1900	0.4047	0.01244	0.40199	0.01338	0.40154	0.0163	0.41019	0.01652
1910	0.40283	0.01175	0.41214	0.01299	0.42289	0.01268	0.40526	0.01535
1920	0.38652	0.01656	0.4041	0.01387	0.42876	0.01439	0.41264	0.01487
PANEL H	Estimates of shared-sibling-household effect (c_sib), using data from panels A-C and Fig. 3A
Birth decade	c_sib (MM)	SE(MM)	c_sib (FF)	SE(FF)	c_sib (FM)	SE(FM)	c_sib (MF)	SE(MF)
1790	0.05734	0.00377	0.06259	0.00468	0.02134	0.0047	0.02527	0.00563
1800	0.05674	0.00322	0.06031	0.0043	0.0247	0.00426	0.03258	0.00412
1810	0.04846	0.00326	0.06494	0.00334	0.02228	0.00382	0.03103	0.00401
1820	0.06001	0.00239	0.06502	0.00289	0.02562	0.00311	0.02219	0.00408
1830	0.06342	0.00206	0.06473	0.00263	0.02486	0.00299	0.02658	0.00356
1840	0.06004	0.00203	0.06548	0.00238	0.0332	0.00259	0.03423	0.00314
1850	0.06792	0.00176	0.05984	0.00234	0.03304	0.00238	0.04091	0.00234
1860	0.06544	0.00183	0.0622	0.00215	0.04014	0.00201	0.03477	0.00258
1870	0.06672	0.00177	0.06964	0.00165	0.03969	0.00216	0.04227	0.0021
1880	0.07357	0.0015	0.06427	0.00154	0.04345	0.00193	0.04464	0.00173
1890	0.08201	0.0015	0.0645	0.00149	0.04318	0.00173	0.04194	0.00215
1900	0.09477	0.00145	0.06404	0.00157	0.04797	0.00179	0.04855	0.00198
1910	0.09663	0.00156	0.05896	0.00175	0.04566	0.00201	0.04628	0.00235
1920	0.0756	0.0019	0.05244	0.00205	0.0276	0.00262	0.03908	0.00265
PANEL I	Estimates of shared-spousal-household effect (c_sp), using data from panels A-C and Fig. 3C
Birth decade	c_sp (FM)	SE(FM)	c_sp (MF)	SE(MF)
1790	0.08206	0.00562	0.07511	0.0057
1800	0.07619	0.0042	0.06837	0.00481
1810	0.0701	0.00376	0.0641	0.00383
1820	0.07218	0.00319	0.05758	0.0041
1830	0.06568	0.00299	0.05279	0.00408
1840	0.06509	0.00274	0.05267	0.00402
1850	0.05689	0.00302	0.0493	0.00412
1860	0.04684	0.0037	0.04325	0.00419
1870	0.04683	0.00322	0.04203	0.00409
1880	0.04481	0.0027	0.03342	0.00448
1890	0.04344	0.00288	0.03823	0.00288
1900	0.04644	0.00252	0.04363	0.0026
1910	0.05338	0.00234	0.04547	0.00296
1920	0.0534	0.00285	0.04487	0.00328

## Sheet: Figure5
Note: tables include the decades before & after those plotted, required for extending the lines to the edges of each panel.
PANEL A	Estimates of assortative mating coefficient (a), from piblings(-in-law)
Birth decade	a (MM)	SE(MM)	a (FF)	SE(FF)	a (FM)	SE(FM)	a (MF)	SE(MF)
1790	0.74103	0.09314	0.55462	0.0767	1.0147	0.21363	0.93661	0.1648
1800	0.77011	0.08673	0.82554	0.12019	0.60993	0.08987	0.65643	0.08128
1810	0.80315	0.07979	0.54579	0.05678	0.67586	0.09771	0.77391	0.09098
1820	0.69795	0.0562	0.58831	0.06541	0.58154	0.07101	0.76276	0.08034
1830	0.74121	0.05794	0.62812	0.06422	0.59459	0.07688	0.6378	0.06446
1840	0.72374	0.06459	0.35733	0.04604	0.74795	0.10802	0.65664	0.085
1850	0.65614	0.05182	0.4527	0.05179	0.58356	0.08173	0.52188	0.0588
1860	0.48105	0.03855	0.41165	0.04986	0.51197	0.07748	0.50545	0.05784
1870	0.47941	0.03633	0.44056	0.04238	0.4329	0.06292	0.46495	0.04855
1880	0.46962	0.03548	0.43924	0.03739	0.49664	0.07021	0.39967	0.0483
1890	0.38982	0.02795	0.4535	0.0342	0.40167	0.05733	0.43776	0.04246
1900	0.35666	0.02426	0.46498	0.03324	0.31708	0.04455	0.44905	0.0326
1910	0.38841	0.02404	0.46274	0.03367	0.39886	0.04981	0.47348	0.03015
1920	0.40845	0.03367	0.62218	0.04993	0.48498	0.07055	0.50674	0.03499
PANEL B	Estimates of assortative mating coefficient (a), from 1st-cousins(-in-law)
Birth decade	a (MM)	SE(MM)	a (FF)	SE(FF)	a (FM)	SE(FM)	a (MF)	SE(MF)
1790	0.84235	0.06012	0.70926	0.05002	0.83351	0.06874	0.89864	0.07942
1800	0.7767	0.04588	0.73459	0.04635	0.83544	0.05845	0.80032	0.06011
1810	0.77347	0.04388	0.67412	0.03906	0.78611	0.04994	0.78531	0.0516
1820	0.78002	0.03513	0.67886	0.03801	0.79056	0.0464	0.7374	0.04447
1830	0.75399	0.02953	0.64573	0.03735	0.71594	0.04204	0.72411	0.04487
1840	0.72102	0.03211	0.64412	0.04023	0.68099	0.04315	0.65651	0.04618
1850	0.72886	0.02897	0.61461	0.03899	0.70882	0.0438	0.63463	0.04381
1860	0.66884	0.0296	0.57824	0.03431	0.60014	0.0444	0.63303	0.04577
1870	0.60789	0.02856	0.61066	0.03132	0.5394	0.04242	0.56924	0.04354
1880	0.56877	0.02158	0.5694	0.02573	0.50268	0.03623	0.48313	0.0378
1890	0.49264	0.01866	0.61952	0.02369	0.51122	0.02902	0.55904	0.03072
1900	0.44478	0.01661	0.59498	0.02222	0.52142	0.02416	0.5343	0.02464
1910	0.47092	0.01506	0.56079	0.02277	0.53443	0.02359	0.55163	0.02255
1920	0.51553	0.01963	0.73891	0.02506	0.60338	0.02985	0.70811	0.02749
PANEL C	Estimates of assortative mating coefficient (a), from 1st-cousins-once-removed(-in-law)
Birth decade	a (MM)	SE(MM)	a (FF)	SE(FF)	a (FM)	SE(FM)	a (MF)	SE(MF)
1790	1.1491	0.14429	0.77089	0.07802	0.85693	0.13232	0.96068	0.13202
1800	1.0374	0.10488	0.79882	0.07569	0.89937	0.1079	0.78249	0.08483
1810	0.92008	0.07661	0.80778	0.07364	0.72111	0.07584	0.97477	0.09926
1820	0.91199	0.06567	0.83717	0.07544	0.80524	0.07731	0.87729	0.07447
1830	0.89384	0.05716	0.71963	0.06991	0.83423	0.08201	0.80702	0.07657
1840	0.92561	0.07674	0.76284	0.0882	0.79929	0.09067	0.83135	0.1042
1850	0.90896	0.06732	0.83195	0.10733	0.67097	0.08521	0.74044	0.08768
1860	0.86469	0.07348	0.70074	0.08483	0.88378	0.12494	0.79995	0.10308
1870	0.74975	0.06516	0.65523	0.07015	0.76255	0.11568	0.67633	0.10655
1880	0.73751	0.05271	0.70785	0.05835	0.57942	0.09042	0.72212	0.11047
1890	0.69932	0.04899	0.70861	0.04963	0.61343	0.07501	0.63227	0.07101
1900	0.56073	0.03875	0.72953	0.04839	0.68184	0.0612	0.71872	0.05811
1910	0.60858	0.03541	0.63469	0.0503	0.66156	0.06345	0.66975	0.04621
1920	0.61496	0.04184	0.79571	0.04865	0.76635	0.08278	0.76286	0.04719
PANEL D	Estimates of transferable variance (t^2), using assortment-correction, from piblings(-in-law)
Birth decade	t^2 (MM)	SE(MM)	t^2 (FF)	SE(FF)	t^2 (FM)	SE(FM)	t^2 (MF)	SE(MF)
1790	0.06031	0.00739	0.09275	0.01134	0.02957	0.00671	0.0338	0.00668
1800	0.05309	0.00594	0.04588	0.00705	0.06969	0.00846	0.06039	0.00736
1810	0.0496	0.005	0.08988	0.00815	0.05408	0.00679	0.04528	0.0056
1820	0.06434	0.00493	0.06637	0.0067	0.06926	0.00666	0.0452	0.005
1830	0.05633	0.00432	0.05845	0.00561	0.05702	0.00586	0.0518	0.00512
1840	0.04662	0.00405	0.08067	0.00696	0.03374	0.00444	0.03488	0.00447
1850	0.05286	0.00386	0.06194	0.00549	0.04405	0.00482	0.04637	0.00461
1860	0.07334	0.00456	0.06245	0.00553	0.04717	0.00507	0.04529	0.00453
1870	0.07256	0.00421	0.0655	0.00479	0.05721	0.00519	0.04983	0.00432
1880	0.07056	0.00403	0.06932	0.00446	0.04553	0.00445	0.04811	0.00441
1890	0.09041	0.00428	0.07142	0.0041	0.05735	0.00481	0.05153	0.00395
1900	0.10643	0.00443	0.07174	0.00393	0.07937	0.00542	0.06578	0.00379
1910	0.10986	0.00438	0.07291	0.00404	0.06734	0.00489	0.07302	0.00379
1920	0.08894	0.00482	0.05388	0.00388	0.05131	0.00501	0.07079	0.00408
PANEL E	Estimates of transferable variance (t^2), using assortment-correction, from 1st-cousins(-in-law)
Birth decade	t^2 (MM)	SE(MM)	t^2 (FF)	SE(FF)	t^2 (FM)	SE(FM)	t^2 (MF)	SE(MF)
1790	0.04127	0.00312	0.06579	0.00462	0.03877	0.00344	0.03192	0.00312
1800	0.04926	0.00295	0.0585	0.00375	0.03844	0.00289	0.03959	0.00311
1810	0.04482	0.00257	0.06377	0.00358	0.04084	0.00271	0.04049	0.00275
1820	0.04805	0.0022	0.05579	0.00303	0.03761	0.00231	0.0427	0.00257
1830	0.0523	0.00205	0.05112	0.00277	0.03944	0.00228	0.03776	0.0023
1840	0.04511	0.00196	0.04209	0.00245	0.03594	0.00218	0.03537	0.00231
1850	0.0442	0.00172	0.04058	0.00232	0.03072	0.00186	0.03435	0.00215
1860	0.04266	0.00175	0.04392	0.00226	0.03147	0.00206	0.03019	0.00197
1870	0.04357	0.00179	0.0417	0.00191	0.03246	0.0021	0.0313	0.00201
1880	0.0568	0.00181	0.04953	0.00191	0.03722	0.0021	0.03794	0.00223
1890	0.07029	0.00202	0.0481	0.00165	0.044	0.00198	0.04005	0.00183
1900	0.08455	0.00223	0.05244	0.00171	0.05175	0.00193	0.05131	0.00191
1910	0.09025	0.00213	0.05384	0.00184	0.05235	0.00189	0.05518	0.00186
1920	0.07164	0.00215	0.04511	0.00153	0.04294	0.00188	0.04135	0.00154
PANEL F	Estimates of transferable variance (t^2), using assortment-correction, from 1st-cousins-once-removed(-in-law)
Birth decade	t^2 (MM)	SE(MM)	t^2 (FF)	SE(FF)	t^2 (FM)	SE(FM)	t^2 (MF)	SE(MF)
1790	0.01534	0.0026	0.05597	0.00652	0.02813	0.00513	0.02259	0.00396
1800	0.0206	0.00269	0.04647	0.00515	0.02714	0.00393	0.03838	0.00482
1810	0.02877	0.00294	0.0406	0.00435	0.0445	0.00502	0.0215	0.00281
1820	0.02974	0.00262	0.03276	0.00353	0.03301	0.00361	0.02863	0.00298
1830	0.03144	0.00243	0.03674	0.00394	0.0262	0.00298	0.02722	0.00304
1840	0.02012	0.00205	0.02385	0.00313	0.02236	0.00287	0.01705	0.00255
1850	0.02086	0.00188	0.01588	0.00243	0.02651	0.00344	0.02078	0.00276
1860	0.01882	0.0019	0.02266	0.00297	0.01169	0.00196	0.01491	0.00224
1870	0.02296	0.0022	0.02635	0.00293	0.01375	0.00229	0.01571	0.00264
1880	0.02696	0.0021	0.02672	0.00239	0.02268	0.00329	0.01301	0.0022
1890	0.02979	0.00221	0.0299	0.00227	0.02453	0.00289	0.02256	0.00259
1900	0.048	0.00307	0.02924	0.00213	0.02624	0.00241	0.02352	0.00209
1910	0.04861	0.00276	0.03337	0.00268	0.02657	0.00256	0.03241	0.00236
1920	0.04489	0.00299	0.02995	0.0021	0.01923	0.00228	0.03005	0.00211

## Sheet: Figure6
Note: tables for panels A-C include the decades before & after those plotted, required for extending the lines to the edges of each panel.
PANEL A	Estimates of transferable variance (t^2), using assortment-correction, from niece-aunt(-in-law) pairs
Birth decade	t^2 (1-10y offset)	SE(1-10y offset)	t^2 (21-30y offset)	SE(21-30y offset)	t^2 (41-50y offset)	SE(41-50y offset)
1790	0.09275	0.01134	0.07391	0.00529	0.051	0.00721
1800	0.04588	0.00705	0.06878	0.00443	0.04305	0.00552
1810	0.08988	0.00815	0.06772	0.00406	0.03931	0.00516
1820	0.06637	0.0067	0.071	0.0036	0.04828	0.00487
1830	0.05845	0.00561	0.06433	0.00319	0.0463	0.00438
1840	0.08067	0.00696	0.06354	0.00302	0.0495	0.00432
1850	0.06194	0.00549	0.06268	0.00267	0.04826	0.00423
1860	0.06245	0.00553	0.05533	0.00247	0.03938	0.00317
1870	0.0655	0.00479	0.05692	0.00235	0.04267	0.00328
1880	0.06932	0.00446	0.06229	0.00222	0.04249	0.00315
1890	0.07142	0.0041	0.06015	0.00202	0.04396	0.00288
1900	0.07174	0.00393	0.06089	0.0018	0.04989	0.00296
1910	0.07291	0.00404	0.05849	0.00179	0.04104	0.00267
1920	0.05388	0.00388	0.03749	0.00294	0.02233	0.00431
PANEL B	Estimates of transferable variance (t^2), using assortment-correction, from nephew-uncle(-in-law) pairs
Birth decade	t^2 (1-10y offset)	SE(1-10y offset)	t^2 (21-30y offset)	SE(21-30y offset)	t^2 (41-50y offset)	SE(41-50y offset)
1790	0.06031	0.00739	0.04593	0.00378	0.04115	0.00535
1800	0.05309	0.00594	0.04724	0.00306	0.04522	0.00465
1810	0.0496	0.005	0.05078	0.00288	0.03083	0.00375
1820	0.06434	0.00493	0.05539	0.00267	0.03231	0.00355
1830	0.05633	0.00432	0.05161	0.00229	0.03739	0.0034
1840	0.04662	0.00405	0.04802	0.00219	0.03732	0.00318
1850	0.05286	0.00386	0.05127	0.00197	0.03726	0.00278
1860	0.07334	0.00456	0.05117	0.00183	0.04269	0.00277
1870	0.07256	0.00421	0.06119	0.00178	0.04141	0.00237
1880	0.07056	0.00403	0.06352	0.00169	0.04493	0.00212
1890	0.09041	0.00428	0.06929	0.00183	0.05389	0.00236
1900	0.10643	0.00443	0.08326	0.00194	0.05706	0.00261
1910	0.10986	0.00438	0.09174	0.00193	0.06093	0.00267
1920	0.08894	0.00482	0.08253	0.00234	0.04908	0.00298
PANEL C	(2 parts)
Estimates of transferable variance (t^2), using assortment-correction, from niece-uncle(-in-law) pairs
Birth decade	t^2 (1-10y offset)	SE(1-10y offset)	t^2 (21-30y offset)	SE(21-30y offset)	t^2 (41-50y offset)	SE(41-50y offset)
1790	0.02957	0.00671	0.04889	0.00425	0.0252	0.0044
1800	0.06969	0.00846	0.0461	0.00355	0.03404	0.00451
1810	0.05408	0.00679	0.05326	0.00362	0.03163	0.00413
1820	0.06926	0.00666	0.0551	0.00306	0.03873	0.00417
1830	0.05702	0.00586	0.04064	0.00234	0.03207	0.00339
1840	0.03374	0.00444	0.04242	0.00234	0.03824	0.00334
1850	0.04405	0.00482	0.03951	0.00202	0.03758	0.00313
1860	0.04717	0.00507	0.03998	0.00201	0.0322	0.00265
1870	0.05721	0.00519	0.04603	0.00233	0.0325	0.00248
1880	0.04553	0.00445	0.04486	0.00202	0.03893	0.00272
1890	0.05735	0.00481	0.0539	0.00204	0.04074	0.00263
1900	0.07937	0.00542	0.055	0.00189	0.03677	0.00245
1910	0.06734	0.00489	0.05748	0.00176	0.04128	0.00251
1920	0.05131	0.00501	0.04066	0.00216	0.02137	0.00264
Estimates of transferable variance (t^2), using assortment-correction, from nephew-aunt(-in-law) pairs
Birth decade	t^2 (1-10y offset)	SE(1-10y offset)	t^2 (21-30y offset)	SE(21-30y offset)	t^2 (41-50y offset)	SE(41-50y offset)
1790	0.0338	0.00668	0.04938	0.00419	0.02538	0.00564
1800	0.06039	0.00736	0.04662	0.00384	0.0507	0.0068
1810	0.04528	0.0056	0.04154	0.00322	0.03293	0.00492
1820	0.0452	0.005	0.03917	0.00268	0.03428	0.00468
1830	0.0518	0.00512	0.04423	0.00265	0.03564	0.00416
1840	0.03488	0.00447	0.03922	0.00263	0.03618	0.00447
1850	0.04637	0.00461	0.04431	0.00236	0.03641	0.00414
1860	0.04529	0.00453	0.04406	0.00216	0.03606	0.00367
1870	0.04983	0.00432	0.04125	0.00192	0.03734	0.00312
1880	0.04811	0.00441	0.03994	0.00179	0.03572	0.00262
1890	0.05153	0.00395	0.04754	0.00192	0.032	0.00247
1900	0.06578	0.00379	0.05705	0.00183	0.0403	0.0028
1910	0.07302	0.00379	0.06192	0.00169	0.04721	0.00259
1920	0.07079	0.00408	0.05106	0.00199	0.03193	0.00263
PANEL D	Estimates of assortative mating coefficient (a), from niece-aunt(-in-law) pairs
Birth-offset(y)	a (1810-1819)	SE(1810-1819)	a (1840-1849)	SE(1840-1849)	a (1870-1879)	SE(1870-1879)	a (1900-1909)	SE(1900-1909)
1-10y	0.54579	0.05678	0.35733	0.04604	0.44056	0.04238	0.46498	0.03324
11-20y	0.56792	0.04246	0.53004	0.03758	0.39241	0.0273	0.46252	0.0215
21-30y	0.59464	0.04305	0.4724	0.03183	0.40636	0.02697	0.46407	0.02023
31-40y	0.59844	0.05162	0.44191	0.03654	0.43931	0.03403	0.39237	0.02485
41-50y	0.66811	0.09659	0.45254	0.0556	0.39594	0.04782	0.36186	0.03639
51-60y	0.68788	0.19465	0.34461	0.07788	0.4445	0.09618	0.26373	0.08077
PANEL E	Estimates of assortative mating coefficient (a), from nephew-uncle(-in-law) pairs
Birth-offset(y)	a (1810-1819)	SE(1810-1819)	a (1840-1849)	SE(1840-1849)	a (1870-1879)	SE(1870-1879)	a (1900-1909)	SE(1900-1909)
1-10y	0.80315	0.07979	0.72374	0.06459	0.47941	0.03633	0.35666	0.02426
11-20y	0.77199	0.05051	0.68958	0.04204	0.53341	0.02512	0.3584	0.01584
21-30y	0.72144	0.04645	0.61621	0.03504	0.53864	0.02139	0.37436	0.01554
31-40y	0.65684	0.05653	0.57806	0.03992	0.5394	0.02659	0.39586	0.01921
41-50y	0.7578	0.10006	0.55548	0.06173	0.54115	0.04061	0.38486	0.02912
51-60y	0.80501	0.1837	0.56385	0.13919	0.59032	0.07596	0.37711	0.04866
PANEL F	(2 parts)
Estimates of assortative mating coefficient (a), from niece-uncle(-in-law) pairs
Birth-offset(y)	a (1810-1819)	SE(1810-1819)	a (1840-1849)	SE(1840-1849)	a (1870-1879)	SE(1870-1879)	a (1900-1909)	SE(1900-1909)
1-10y	0.67586	0.09771	0.74795	0.10802	0.4329	0.06292	0.31708	0.04455
11-20y	0.65993	0.05953	0.6022	0.05048	0.44511	0.04	0.44192	0.02813
21-30y	0.61888	0.05158	0.61358	0.04219	0.39206	0.03402	0.41736	0.02358
31-40y	0.71293	0.06718	0.59075	0.04536	0.44795	0.03763	0.384	0.02535
41-50y	0.74986	0.10165	0.54563	0.05956	0.52919	0.05112	0.43356	0.04156
51-60y	0.90137	0.23739	0.75021	0.14145	0.52484	0.08638	0.40713	0.07016
Estimates of assortative mating coefficient (a), from niece-uncle(-in-law) pairs
Birth-offset(y)	a (1810-1819)	SE(1810-1819)	a (1840-1849)	SE(1840-1849)	a (1870-1879)	SE(1870-1879)	a (1900-1909)	SE(1900-1909)
1-10y	0.77391	0.09098	0.65664	0.085	0.46495	0.04855	0.44905	0.0326
11-20y	0.70423	0.05837	0.63903	0.04988	0.47044	0.03395	0.42509	0.02162
21-30y	0.70543	0.06021	0.53278	0.0466	0.51279	0.03248	0.42693	0.02134
31-40y	0.70294	0.0718	0.51703	0.05874	0.4885	0.03802	0.42347	0.02614
41-50y	0.64869	0.11431	0.4129	0.08166	0.42286	0.05658	0.40628	0.0471
51-60y	0.62971	0.218	0.24373	0.17725	0.26584	0.09735	0.36665	0.10399
PANEL G	Estimates of transferable variance (t^2), using assortment-correction, from niece-aunt(-in-law) pairs
Birth-offset(y)	t^2 (1810-1819)	SE(1810-1819)	t^2 (1840-1849)	SE(1840-1849)	t^2 (1870-1879)	SE(1870-1879)	t^2 (1900-1909)	SE(1900-1909)
1-10y	0.08988	0.00815	0.08067	0.00696	0.0655	0.00479	0.07174	0.00393
11-20y	0.07983	0.00497	0.05965	0.00335	0.06683	0.00294	0.06788	0.00222
21-30y	0.06772	0.00406	0.06354	0.00302	0.05692	0.00235	0.06089	0.0018
31-40y	0.05984	0.00429	0.05994	0.00334	0.04572	0.00233	0.05572	0.00212
41-50y	0.03931	0.00516	0.0495	0.00432	0.04267	0.00328	0.04989	0.00296
51-60y	0.0303	0.00825	0.05905	0.00834	0.0322	0.00515	0.03838	0.0058
PANEL H	Estimates of transferable variance (t^2), using assortment-correction, from nephew-uncle(-in-law) pairs
Birth-offset(y)	t^2 (1810-1819)	SE(1810-1819)	t^2 (1840-1849)	SE(1840-1849)	t^2 (1870-1879)	SE(1870-1879)	t^2 (1900-1909)	SE(1900-1909)
1-10y	0.0496	0.005	0.04662	0.00405	0.07256	0.00421	0.10643	0.00443
11-20y	0.05196	0.00321	0.04519	0.00245	0.06251	0.00222	0.09904	0.00247
21-30y	0.05078	0.00288	0.04802	0.00219	0.06119	0.00178	0.08326	0.00194
31-40y	0.046	0.00328	0.04539	0.0024	0.05127	0.00186	0.06863	0.00196
41-50y	0.03083	0.00375	0.03732	0.00318	0.04141	0.00237	0.05706	0.00261
51-60y	0.02468	0.00555	0.02562	0.00515	0.033	0.00362	0.05284	0.00438
PANEL I	(2 parts)
Estimates of transferable variance (t^2), using assortment-correction, from niece-uncle(-in-law) pairs
Birth-offset(y)	t^2 (1810-1819)	SE(1810-1819)	t^2 (1840-1849)	SE(1840-1849)	t^2 (1870-1879)	SE(1870-1879)	t^2 (1900-1909)	SE(1900-1909)
1-10y	0.05408	0.00679	0.03374	0.00444	0.05721	0.00519	0.07937	0.00542
11-20y	0.05455	0.00417	0.045	0.00298	0.04811	0.00275	0.05848	0.00235
21-30y	0.05326	0.00362	0.04242	0.00234	0.04603	0.00233	0.055	0.00189
31-40y	0.03952	0.00336	0.04022	0.00247	0.03921	0.00219	0.0522	0.00204
41-50y	0.03163	0.00413	0.03824	0.00334	0.0325	0.00248	0.03677	0.00245
51-60y	0.01949	0.00557	0.0228	0.00433	0.02888	0.00404	0.03324	0.00421
Estimates of transferable variance (t^2), using assortment-correction, from nephew-aunt(-in-law) pairs
Birth-offset(y)	t^2 (1810-1819)	SE(1810-1819)	t^2 (1840-1849)	SE(1840-1849)	t^2 (1870-1879)	SE(1870-1879)	t^2 (1900-1909)	SE(1900-1909)
1-10y	0.04528	0.0056	0.03488	0.00447	0.04983	0.00432	0.06578	0.00379
11-20y	0.04803	0.00378	0.03893	0.00274	0.04622	0.00247	0.06396	0.00222
21-30y	0.04154	0.00322	0.03922	0.00263	0.04125	0.00192	0.05705	0.00183
31-40y	0.03828	0.00347	0.03454	0.00287	0.03898	0.0021	0.05185	0.00198
41-50y	0.03293	0.00492	0.03618	0.00447	0.03734	0.00312	0.0403	0.0028
51-60y	0.02811	0.00822	0.03326	0.01001	0.04344	0.00695	0.03299	0.00522

## Sheet: SuppFig_S1
PANEL A+B	Mean IBD values for real and in-law relative types
Relative type	Exp. %IBD*	Obs. %IBD(real)	%IBD in-law (opposite gender)	%IBD in-law (same gender)
spouses	N/A	N/A	0.20129	N/A
siblings	N/A	N/A	0.27597	0.18605
piblings	0.25	22.121	0.32319	0.23999
1st-cuz	0.125	10.804	0.1177	0.08989
1st-cuz-1R	0.0625	5.1558	0.10636	0.08918
2nd-cuz	0.03125	2.5628	0.03218	0.03182
*NOTE: spouses have no blood-relative equivalent, and were only analyzed if they were opposite-gender.

## Sheet: SuppFig_S2
PANEL A	Siblings
Mean obs. diff (norm):		-0.01494
S.D. of obs. diff. (norm):		1.0543
Genders	Birth decade	Birth offset	Est(even)	SE(even)	Est(odd)	SE(odd)
MF	1700	-20,-10yrs	0.02682	0.01613	0.05668	0.01672
MF	1710	-20,-10yrs	0.04877	0.01476	0.06875	0.01536
MF	1720	-20,-10yrs	0.05959	0.01394	0.04777	0.01448
MF	1730	-20,-10yrs	0.04701	0.01291	0.04797	0.01315
MF	1740	-20,-10yrs	0.06195	0.0113	0.04116	0.01168
MF	1750	-20,-10yrs	0.05471	0.01009	0.04728	0.01037
MF	1760	-20,-10yrs	0.07864	0.00906	0.06178	0.00905
MF	1770	-20,-10yrs	0.06644	0.00782	0.07007	0.00784
MF	1780	-20,-10yrs	0.06003	0.00679	0.06574	0.00682
MF	1790	-20,-10yrs	0.06045	0.00564	0.0701	0.00562
MF	1800	-20,-10yrs	0.05576	0.00472	0.06523	0.00476
MF	1810	-20,-10yrs	0.06781	0.00405	0.06744	0.00407
MF	1820	-20,-10yrs	0.06189	0.00354	0.05835	0.00354
MF	1830	-20,-10yrs	0.05759	0.00311	0.0627	0.00311
MF	1840	-20,-10yrs	0.06118	0.00275	0.05466	0.00277
MF	1850	-20,-10yrs	0.05791	0.0025	0.05878	0.00253
MF	1860	-20,-10yrs	0.06021	0.00236	0.05717	0.00232
MF	1870	-20,-10yrs	0.06074	0.00214	0.05551	0.00217
MF	1880	-20,-10yrs	0.05646	0.00199	0.05617	0.002
MF	1890	-20,-10yrs	0.05846	0.00186	0.06172	0.00189
MF	1900	-20,-10yrs	0.06188	0.00188	0.06601	0.0019
MF	1910	-20,-10yrs	0.07212	0.00197	0.07002	0.002
MF	1920	-20,-10yrs	0.06471	0.0022	0.06003	0.00225
MM	1700	-10,0yrs	0.10481	0.00781	0.09057	0.00814
MM	1710	-10,0yrs	0.1107	0.00744	0.1135	0.00761
MM	1720	-10,0yrs	0.10841	0.00679	0.09755	0.00689
MM	1730	-10,0yrs	0.10671	0.00611	0.10022	0.00629
MM	1740	-10,0yrs	0.11463	0.00554	0.10174	0.00565
MM	1750	-10,0yrs	0.1049	0.00478	0.10127	0.00488
MM	1760	-10,0yrs	0.10807	0.00426	0.10162	0.00429
MM	1770	-10,0yrs	0.10097	0.00377	0.1017	0.00382
MM	1780	-10,0yrs	0.0967	0.0033	0.10108	0.00331
MM	1790	-10,0yrs	0.09676	0.00274	0.09971	0.00274
MM	1800	-10,0yrs	0.0966	0.00231	0.0944	0.00232
MM	1810	-10,0yrs	0.0953	0.00201	0.0926	0.00203
MM	1820	-10,0yrs	0.10059	0.00177	0.09645	0.00176
MM	1830	-10,0yrs	0.10019	0.00159	0.10297	0.00159
MM	1840	-10,0yrs	0.09606	0.00146	0.09924	0.00147
MM	1850	-10,0yrs	0.10152	0.00132	0.10119	0.00133
MM	1860	-10,0yrs	0.09815	0.00124	0.09865	0.00123
MM	1870	-10,0yrs	0.09916	0.00112	0.09767	0.00112
MM	1880	-10,0yrs	0.10321	0.00105	0.10342	0.00106
MM	1890	-10,0yrs	0.10985	0.00101	0.11187	0.00102
MM	1900	-10,0yrs	0.12187	0.00104	0.12247	0.00105
MM	1910	-10,0yrs	0.13078	0.00107	0.12851	0.00108
MM	1920	-10,0yrs	0.11071	0.00123	0.10804	0.00127
MM	1700	-20,-10yrs	0.0715	0.01403	0.09103	0.01465
MM	1710	-20,-10yrs	0.06689	0.01278	0.08716	0.01328
MM	1720	-20,-10yrs	0.07136	0.01196	0.07856	0.01227
MM	1730	-20,-10yrs	0.09326	0.0109	0.0813	0.0111
MM	1740	-20,-10yrs	0.09393	0.00957	0.09155	0.00987
MM	1750	-20,-10yrs	0.08427	0.0085	0.07428	0.00866
MM	1760	-20,-10yrs	0.07955	0.00752	0.07915	0.00755
MM	1770	-20,-10yrs	0.07825	0.00648	0.08591	0.00654
MM	1780	-20,-10yrs	0.07947	0.00571	0.07928	0.00575
MM	1790	-20,-10yrs	0.07986	0.00475	0.07889	0.00475
MM	1800	-20,-10yrs	0.08002	0.004	0.07924	0.00404
MM	1810	-20,-10yrs	0.07951	0.00343	0.07678	0.00347
MM	1820	-20,-10yrs	0.07705	0.00306	0.07952	0.00306
MM	1830	-20,-10yrs	0.08624	0.00271	0.08183	0.00272
MM	1840	-20,-10yrs	0.07116	0.00247	0.07331	0.00249
MM	1850	-20,-10yrs	0.07674	0.00232	0.07985	0.00235
MM	1860	-20,-10yrs	0.08168	0.00217	0.07635	0.00214
MM	1870	-20,-10yrs	0.08452	0.002	0.07662	0.00201
MM	1880	-20,-10yrs	0.0831	0.00187	0.08474	0.00188
MM	1890	-20,-10yrs	0.09157	0.00177	0.09035	0.00179
MM	1900	-20,-10yrs	0.09684	0.0018	0.1013	0.00182
MM	1910	-20,-10yrs	0.10863	0.00191	0.10955	0.00193
MM	1920	-20,-10yrs	0.09309	0.00214	0.09468	0.0022
FF	1700	-30,-20yrs	0.07519	0.04459	0.05686	0.04285
FF	1710	-30,-20yrs	0.08537	0.04124	0.19836	0.0421
FF	1720	-30,-20yrs	0.13699	0.03794	0.12589	0.03846
FF	1730	-30,-20yrs	0.04775	0.03539	0.12491	0.03854
FF	1740	-30,-20yrs	0.10222	0.03292	0.10745	0.03478
FF	1750	-30,-20yrs	0.0739	0.03011	0.04009	0.03161
FF	1760	-30,-20yrs	0.10547	0.02615	0.03997	0.02707
FF	1770	-30,-20yrs	0.07124	0.02274	0.05383	0.02408
FF	1780	-30,-20yrs	0.068	0.01973	0.08015	0.02006
FF	1790	-30,-20yrs	0.11303	0.01697	0.06914	0.01752
FF	1800	-30,-20yrs	0.04372	0.01457	0.08043	0.01481
FF	1810	-30,-20yrs	0.07046	0.01286	0.07698	0.01303
FF	1820	-30,-20yrs	0.06796	0.01119	0.08814	0.01126
FF	1830	-30,-20yrs	0.07615	0.01003	0.07233	0.00995
FF	1840	-30,-20yrs	0.06828	0.00887	0.04627	0.00891
FF	1850	-30,-20yrs	0.05255	0.00819	0.06664	0.00834
FF	1860	-30,-20yrs	0.05193	0.00781	0.06084	0.00774
FF	1870	-30,-20yrs	0.0629	0.00715	0.0527	0.00728
FF	1880	-30,-20yrs	0.05616	0.00687	0.06001	0.0069
FF	1890	-30,-20yrs	0.05801	0.00622	0.06004	0.00626
FF	1900	-30,-20yrs	0.05933	0.00626	0.06973	0.00623
FF	1910	-30,-20yrs	0.06304	0.00643	0.05626	0.00653
FF	1920	-30,-20yrs	0.04127	0.00762	0.0234	0.00788
MM	1700	-30,-20yrs	0.09209	0.03495	0.08614	0.03701
MM	1710	-30,-20yrs	0.06647	0.03247	0.06839	0.03452
MM	1720	-30,-20yrs	0.07153	0.02942	0.11235	0.03085
MM	1730	-30,-20yrs	0.09279	0.02925	0.0573	0.03012
MM	1740	-30,-20yrs	0.04723	0.02537	0.05587	0.02611
MM	1750	-30,-20yrs	0.04962	0.02053	0.07692	0.02233
MM	1760	-30,-20yrs	0.06123	0.01964	0.0205	0.01943
MM	1770	-30,-20yrs	0.07542	0.01633	0.075	0.01683
MM	1780	-30,-20yrs	0.04887	0.01425	0.04895	0.0147
MM	1790	-30,-20yrs	0.04793	0.01248	0.03801	0.01262
MM	1800	-30,-20yrs	0.0613	0.01076	0.07964	0.01094
MM	1810	-30,-20yrs	0.06851	0.0095	0.05934	0.00967
MM	1820	-30,-20yrs	0.07586	0.00849	0.0471	0.00859
MM	1830	-30,-20yrs	0.06556	0.00793	0.07005	0.00803
MM	1840	-30,-20yrs	0.0562	0.00725	0.05949	0.00738
MM	1850	-30,-20yrs	0.05893	0.00689	0.0511	0.00706
MM	1860	-30,-20yrs	0.05956	0.00692	0.06003	0.0068
MM	1870	-30,-20yrs	0.06382	0.00636	0.06823	0.00641
MM	1880	-30,-20yrs	0.07088	0.00621	0.05069	0.00632
MM	1890	-30,-20yrs	0.07202	0.00578	0.08181	0.00581
MM	1900	-30,-20yrs	0.06754	0.00585	0.0778	0.00594
MM	1910	-30,-20yrs	0.08874	0.00613	0.07316	0.00624
MM	1920	-30,-20yrs	0.06279	0.00722	0.0755	0.00727
MF	1700	-10,0yrs	0.06312	0.00897	0.04549	0.0093
MF	1710	-10,0yrs	0.05685	0.00867	0.0576	0.00876
MF	1720	-10,0yrs	0.07907	0.00782	0.07469	0.00795
MF	1730	-10,0yrs	0.0631	0.00716	0.05624	0.00732
MF	1740	-10,0yrs	0.05851	0.00652	0.06104	0.00661
MF	1750	-10,0yrs	0.06004	0.00575	0.07922	0.00585
MF	1760	-10,0yrs	0.07643	0.00506	0.07797	0.00507
MF	1770	-10,0yrs	0.07116	0.00445	0.07704	0.00446
MF	1780	-10,0yrs	0.07378	0.00386	0.07131	0.00386
MF	1790	-10,0yrs	0.07038	0.00322	0.07389	0.00321
MF	1800	-10,0yrs	0.07003	0.00272	0.07078	0.00272
MF	1810	-10,0yrs	0.07344	0.00234	0.068	0.00235
MF	1820	-10,0yrs	0.06794	0.00202	0.06836	0.00202
MF	1830	-10,0yrs	0.06872	0.00177	0.06624	0.00178
MF	1840	-10,0yrs	0.06993	0.00158	0.0698	0.00159
MF	1850	-10,0yrs	0.06903	0.00144	0.07003	0.00145
MF	1860	-10,0yrs	0.06342	0.00134	0.06351	0.00133
MF	1870	-10,0yrs	0.06373	0.00121	0.06344	0.00121
MF	1880	-10,0yrs	0.06138	0.00112	0.06273	0.00113
MF	1890	-10,0yrs	0.0681	0.00106	0.06938	0.00107
MF	1900	-10,0yrs	0.07236	0.00108	0.07855	0.00109
MF	1910	-10,0yrs	0.08418	0.00111	0.08141	0.00112
MF	1920	-10,0yrs	0.07812	0.00129	0.08118	0.00132
FM	1700	-20,-10yrs	0.05411	0.01544	0.0574	0.01638
FM	1710	-20,-10yrs	0.04808	0.01441	0.05441	0.01487
FM	1720	-20,-10yrs	0.05512	0.01369	0.06234	0.01407
FM	1730	-20,-10yrs	0.08617	0.01259	0.06078	0.01271
FM	1740	-20,-10yrs	0.07494	0.01129	0.05725	0.01152
FM	1750	-20,-10yrs	0.07506	0.01019	0.05126	0.01037
FM	1760	-20,-10yrs	0.04576	0.00876	0.05012	0.00882
FM	1770	-20,-10yrs	0.06863	0.0076	0.06336	0.00772
FM	1780	-20,-10yrs	0.06881	0.00666	0.05111	0.00678
FM	1790	-20,-10yrs	0.06156	0.00563	0.0628	0.00568
FM	1800	-20,-10yrs	0.06238	0.00472	0.06027	0.00474
FM	1810	-20,-10yrs	0.05689	0.00401	0.05772	0.004
FM	1820	-20,-10yrs	0.05587	0.00349	0.06413	0.00349
FM	1830	-20,-10yrs	0.06396	0.00301	0.06279	0.00302
FM	1840	-20,-10yrs	0.06071	0.00269	0.06349	0.00271
FM	1850	-20,-10yrs	0.05615	0.00256	0.06167	0.00258
FM	1860	-20,-10yrs	0.05659	0.00234	0.05548	0.00232
FM	1870	-20,-10yrs	0.05357	0.00214	0.05449	0.00216
FM	1880	-20,-10yrs	0.05844	0.00199	0.05991	0.00199
FM	1890	-20,-10yrs	0.0593	0.00185	0.06327	0.00187
FM	1900	-20,-10yrs	0.06596	0.00188	0.06224	0.00189
FM	1910	-20,-10yrs	0.07096	0.00197	0.06917	0.002
FM	1920	-20,-10yrs	0.04815	0.00229	0.05364	0.00237
MF	1700	-30,-20yrs	0.03695	0.03976	-0.00705	0.0444
MF	1710	-30,-20yrs	0.03293	0.03886	0.02457	0.04078
MF	1720	-30,-20yrs	0.06283	0.03585	0.05261	0.03637
MF	1730	-30,-20yrs	-0.00155	0.03499	0.01683	0.03668
MF	1740	-30,-20yrs	0.03996	0.03075	0.01632	0.03193
MF	1750	-30,-20yrs	0.02279	0.02603	0.05069	0.02763
MF	1760	-30,-20yrs	0.04061	0.02358	0.03304	0.02488
MF	1770	-30,-20yrs	0.0281	0.02105	0.07566	0.02125
MF	1780	-30,-20yrs	0.03074	0.01776	0.05437	0.0182
MF	1790	-30,-20yrs	0.03514	0.01519	0.04479	0.01535
MF	1800	-30,-20yrs	0.05337	0.01275	0.06101	0.01331
MF	1810	-30,-20yrs	0.06794	0.01132	0.04929	0.01158
MF	1820	-30,-20yrs	0.06217	0.01017	0.06133	0.01016
MF	1830	-30,-20yrs	0.04306	0.00928	0.05579	0.00934
MF	1840	-30,-20yrs	0.03702	0.00834	0.04177	0.00846
MF	1850	-30,-20yrs	0.05119	0.00769	0.053	0.00778
MF	1860	-30,-20yrs	0.04981	0.00741	0.05363	0.00726
MF	1870	-30,-20yrs	0.04595	0.00689	0.0446	0.00693
MF	1880	-30,-20yrs	0.04643	0.00662	0.06056	0.00664
MF	1890	-30,-20yrs	0.04906	0.00609	0.04627	0.00609
MF	1900	-30,-20yrs	0.04069	0.00619	0.04994	0.00622
MF	1910	-30,-20yrs	0.06085	0.00638	0.0549	0.00646
MF	1920	-30,-20yrs	0.04368	0.00732	0.05305	0.00748
FF	1700	-10,0yrs	0.11353	0.00976	0.10751	0.01005
FF	1710	-10,0yrs	0.11387	0.00924	0.12069	0.00941
FF	1720	-10,0yrs	0.12147	0.00861	0.12198	0.00857
FF	1730	-10,0yrs	0.12776	0.00779	0.12951	0.00792
FF	1740	-10,0yrs	0.12027	0.0072	0.11352	0.00729
FF	1750	-10,0yrs	0.12332	0.00648	0.12875	0.00658
FF	1760	-10,0yrs	0.11786	0.00571	0.10572	0.00566
FF	1770	-10,0yrs	0.12177	0.00497	0.12384	0.00503
FF	1780	-10,0yrs	0.11765	0.00433	0.11953	0.00437
FF	1790	-10,0yrs	0.11322	0.00366	0.10831	0.00365
FF	1800	-10,0yrs	0.10764	0.00308	0.1125	0.00309
FF	1810	-10,0yrs	0.10927	0.00265	0.10461	0.00264
FF	1820	-10,0yrs	0.10539	0.00225	0.10365	0.00225
FF	1830	-10,0yrs	0.10111	0.00194	0.10039	0.00193
FF	1840	-10,0yrs	0.09642	0.0017	0.09599	0.00171
FF	1850	-10,0yrs	0.09063	0.00156	0.09418	0.00156
FF	1860	-10,0yrs	0.09114	0.00142	0.09192	0.00142
FF	1870	-10,0yrs	0.09252	0.00127	0.09337	0.00127
FF	1880	-10,0yrs	0.09103	0.00117	0.08997	0.00118
FF	1890	-10,0yrs	0.09349	0.0011	0.0906	0.00111
FF	1900	-10,0yrs	0.09189	0.00111	0.09475	0.00112
FF	1910	-10,0yrs	0.09105	0.00113	0.09222	0.00115
FF	1920	-10,0yrs	0.08908	0.00136	0.09237	0.00141
FF	1700	-20,-10yrs	0.09984	0.01666	0.06872	0.01763
FF	1710	-20,-10yrs	0.10726	0.01555	0.10639	0.016
FF	1720	-20,-10yrs	0.09703	0.01493	0.11046	0.01531
FF	1730	-20,-10yrs	0.07126	0.01376	0.10121	0.01399
FF	1740	-20,-10yrs	0.11064	0.01248	0.08922	0.01269
FF	1750	-20,-10yrs	0.08804	0.01137	0.08455	0.01171
FF	1760	-20,-10yrs	0.09183	0.01002	0.08742	0.01005
FF	1770	-20,-10yrs	0.08724	0.00871	0.10475	0.00875
FF	1780	-20,-10yrs	0.10636	0.00758	0.09414	0.0076
FF	1790	-20,-10yrs	0.08804	0.00633	0.08897	0.00638
FF	1800	-20,-10yrs	0.08926	0.00534	0.09467	0.00536
FF	1810	-20,-10yrs	0.07752	0.00458	0.08158	0.00457
FF	1820	-20,-10yrs	0.08444	0.00392	0.08067	0.00393
FF	1830	-20,-10yrs	0.08036	0.00338	0.08042	0.00336
FF	1840	-20,-10yrs	0.08145	0.00294	0.07859	0.00294
FF	1850	-20,-10yrs	0.07455	0.0027	0.07524	0.00271
FF	1860	-20,-10yrs	0.07515	0.00249	0.07265	0.00247
FF	1870	-20,-10yrs	0.07863	0.00226	0.07346	0.00227
FF	1880	-20,-10yrs	0.07726	0.00207	0.07555	0.00207
FF	1890	-20,-10yrs	0.07531	0.00192	0.07796	0.00194
FF	1900	-20,-10yrs	0.08033	0.00193	0.07594	0.00194
FF	1910	-20,-10yrs	0.07795	0.00201	0.0684	0.00203
FF	1920	-20,-10yrs	0.0627	0.0023	0.05982	0.00239
FM	1700	-10,0yrs	0.05812	0.0089	0.05837	0.00919
FM	1710	-10,0yrs	0.04091	0.00839	0.04528	0.00863
FM	1720	-10,0yrs	0.06269	0.00786	0.08321	0.00787
FM	1730	-10,0yrs	0.07834	0.00704	0.08309	0.00716
FM	1740	-10,0yrs	0.06492	0.00652	0.07358	0.00658
FM	1750	-10,0yrs	0.06619	0.00576	0.07124	0.00579
FM	1760	-10,0yrs	0.07117	0.005	0.07328	0.00503
FM	1770	-10,0yrs	0.07152	0.00443	0.07896	0.00449
FM	1780	-10,0yrs	0.07717	0.00386	0.06762	0.00389
FM	1790	-10,0yrs	0.07164	0.00324	0.06782	0.00324
FM	1800	-10,0yrs	0.08	0.00273	0.06941	0.00273
FM	1810	-10,0yrs	0.06937	0.00236	0.07333	0.00235
FM	1820	-10,0yrs	0.06917	0.00203	0.06927	0.00202
FM	1830	-10,0yrs	0.06714	0.00177	0.06796	0.00177
FM	1840	-10,0yrs	0.06573	0.0016	0.07029	0.00161
FM	1850	-10,0yrs	0.06581	0.00146	0.0676	0.00146
FM	1860	-10,0yrs	0.06575	0.00134	0.06526	0.00134
FM	1870	-10,0yrs	0.06412	0.00121	0.06628	0.00122
FM	1880	-10,0yrs	0.06635	0.00112	0.06605	0.00113
FM	1890	-10,0yrs	0.06713	0.00106	0.06893	0.00108
FM	1900	-10,0yrs	0.07753	0.00109	0.07648	0.0011
FM	1910	-10,0yrs	0.08256	0.00111	0.08132	0.00113
FM	1920	-10,0yrs	0.06844	0.00133	0.06819	0.00138
FM	1700	-30,-20yrs	-0.00733	0.0401	0.00996	0.04094
FM	1710	-30,-20yrs	0.03361	0.03855	-0.02032	0.04012
FM	1720	-30,-20yrs	0.03657	0.03632	0.10348	0.03662
FM	1730	-30,-20yrs	0.06387	0.03332	0.05448	0.03495
FM	1740	-30,-20yrs	0.0557	0.0298	-0.0239	0.0315
FM	1750	-30,-20yrs	0.07897	0.02727	0.04466	0.02788
FM	1760	-30,-20yrs	0.02905	0.02329	0.06022	0.02319
FM	1770	-30,-20yrs	0.05512	0.01984	0.05586	0.0201
FM	1780	-30,-20yrs	0.06588	0.01662	0.04998	0.01766
FM	1790	-30,-20yrs	0.04448	0.01475	0.04892	0.01494
FM	1800	-30,-20yrs	0.04665	0.01254	0.05646	0.01275
FM	1810	-30,-20yrs	0.07323	0.011	0.03364	0.01128
FM	1820	-30,-20yrs	0.0447	0.00965	0.05068	0.00987
FM	1830	-30,-20yrs	0.05701	0.0087	0.0696	0.00883
FM	1840	-30,-20yrs	0.04653	0.00779	0.05276	0.0079
FM	1850	-30,-20yrs	0.03936	0.00754	0.05564	0.00767
FM	1860	-30,-20yrs	0.0461	0.00739	0.04453	0.00738
FM	1870	-30,-20yrs	0.04705	0.00671	0.04004	0.00674
FM	1880	-30,-20yrs	0.0408	0.00652	0.05048	0.00661
FM	1890	-30,-20yrs	0.0511	0.00596	0.06451	0.00598
FM	1900	-30,-20yrs	0.04674	0.00604	0.05536	0.00606
FM	1910	-30,-20yrs	0.04588	0.00625	0.05514	0.00638
FM	1920	-30,-20yrs	0.04654	0.00753	0.05899	0.00778
PANEL B	1st cousins
Mean obs. diff (norm):		0.12047
S.D. of obs. diff. (norm):		0.82498
Genders	Birth decade	Birth offset	Est(even)	SE(even)	Est(odd)	SE(odd)
FM	1700	-20,-10yrs	0.01479	0.00813	0.0019	0.00841
FM	1710	-20,-10yrs	0.02455	0.00724	0.01351	0.00738
FM	1720	-20,-10yrs	0.02466	0.00677	0.0234	0.00681
FM	1730	-20,-10yrs	0.0281	0.00613	0.02278	0.00615
FM	1740	-20,-10yrs	0.02478	0.00551	0.03248	0.00559
FM	1750	-20,-10yrs	0.02613	0.005	0.03405	0.00506
FM	1760	-20,-10yrs	0.03139	0.00441	0.01921	0.00443
FM	1770	-20,-10yrs	0.0264	0.00388	0.02694	0.00394
FM	1780	-20,-10yrs	0.02391	0.00341	0.02512	0.00345
FM	1790	-20,-10yrs	0.02456	0.00293	0.02633	0.00294
FM	1800	-20,-10yrs	0.02712	0.00248	0.02607	0.00248
FM	1810	-20,-10yrs	0.02758	0.00211	0.02549	0.00211
FM	1820	-20,-10yrs	0.02868	0.00181	0.0278	0.00181
FM	1830	-20,-10yrs	0.02246	0.00156	0.0234	0.00156
FM	1840	-20,-10yrs	0.02053	0.00138	0.01973	0.00139
FM	1850	-20,-10yrs	0.01916	0.00127	0.01738	0.00127
FM	1860	-20,-10yrs	0.01362	0.00115	0.01514	0.00114
FM	1870	-20,-10yrs	0.01233	0.00103	0.01288	0.00104
FM	1880	-20,-10yrs	0.01398	0.00097	0.01338	0.00097
FM	1890	-20,-10yrs	0.01531	0.00091	0.01442	0.00091
FM	1900	-20,-10yrs	0.01762	0.0009	0.01766	0.0009
FM	1910	-20,-10yrs	0.01995	0.00091	0.01937	0.00092
FM	1920	-20,-10yrs	0.01441	0.00102	0.01188	0.00105
MF	1700	-20,-10yrs	0.01542	0.00815	0.01535	0.00846
MF	1710	-20,-10yrs	0.019	0.00738	0.02392	0.00752
MF	1720	-20,-10yrs	0.01955	0.00689	0.0194	0.00693
MF	1730	-20,-10yrs	0.02901	0.00614	0.01262	0.00623
MF	1740	-20,-10yrs	0.03275	0.00549	0.01869	0.00563
MF	1750	-20,-10yrs	0.01928	0.00497	0.02378	0.00506
MF	1760	-20,-10yrs	0.02849	0.00448	0.02518	0.00452
MF	1770	-20,-10yrs	0.02312	0.00395	0.02658	0.00398
MF	1780	-20,-10yrs	0.02594	0.00344	0.02462	0.00346
MF	1790	-20,-10yrs	0.02916	0.00294	0.02383	0.00294
MF	1800	-20,-10yrs	0.02538	0.00249	0.02504	0.00249
MF	1810	-20,-10yrs	0.02631	0.00213	0.02666	0.00214
MF	1820	-20,-10yrs	0.02661	0.00185	0.02761	0.00184
MF	1830	-20,-10yrs	0.02453	0.00161	0.02219	0.00161
MF	1840	-20,-10yrs	0.01646	0.00141	0.01808	0.00141
MF	1850	-20,-10yrs	0.01689	0.00126	0.01705	0.00126
MF	1860	-20,-10yrs	0.01687	0.00116	0.01465	0.00114
MF	1870	-20,-10yrs	0.01428	0.00104	0.01316	0.00104
MF	1880	-20,-10yrs	0.01361	0.00098	0.01487	0.00098
MF	1890	-20,-10yrs	0.0159	0.00092	0.01687	0.00092
MF	1900	-20,-10yrs	0.01883	0.0009	0.01895	0.00091
MF	1910	-20,-10yrs	0.02349	0.00092	0.02369	0.00092
MF	1920	-20,-10yrs	0.01932	0.00099	0.01891	0.00101
MF	1700	-10,0yrs	0.02356	0.00645	0.01525	0.00668
MF	1710	-10,0yrs	0.01887	0.00603	0.02013	0.00611
MF	1720	-10,0yrs	0.03048	0.00545	0.02891	0.00552
MF	1730	-10,0yrs	0.02881	0.00488	0.03087	0.00495
MF	1740	-10,0yrs	0.03311	0.00444	0.02545	0.00451
MF	1750	-10,0yrs	0.03156	0.00398	0.03046	0.00403
MF	1760	-10,0yrs	0.03353	0.00353	0.02858	0.00354
MF	1770	-10,0yrs	0.02383	0.00314	0.02672	0.00313
MF	1780	-10,0yrs	0.02487	0.00274	0.02913	0.00273
MF	1790	-10,0yrs	0.02417	0.00229	0.02926	0.00229
MF	1800	-10,0yrs	0.02844	0.00194	0.02936	0.00194
MF	1810	-10,0yrs	0.02869	0.00167	0.0281	0.00167
MF	1820	-10,0yrs	0.02888	0.00144	0.02686	0.00143
MF	1830	-10,0yrs	0.02528	0.00126	0.02284	0.00125
MF	1840	-10,0yrs	0.0202	0.00111	0.01938	0.00111
MF	1850	-10,0yrs	0.01835	0.001	0.01854	0.001
MF	1860	-10,0yrs	0.01609	0.00092	0.01598	0.00091
MF	1870	-10,0yrs	0.01558	0.00083	0.01412	0.00083
MF	1880	-10,0yrs	0.01516	0.00077	0.01541	0.00077
MF	1890	-10,0yrs	0.01943	0.00073	0.01805	0.00074
MF	1900	-10,0yrs	0.0224	0.00073	0.02344	0.00073
MF	1910	-10,0yrs	0.02544	0.00074	0.02531	0.00074
MF	1920	-10,0yrs	0.02603	0.00083	0.02491	0.00085
FM	1700	-10,0yrs	0.02023	0.0064	0.01545	0.0065
FM	1710	-10,0yrs	0.01866	0.00589	0.02025	0.006
FM	1720	-10,0yrs	0.03266	0.00541	0.0298	0.00543
FM	1730	-10,0yrs	0.02324	0.00484	0.02768	0.00489
FM	1740	-10,0yrs	0.03312	0.00443	0.02894	0.00445
FM	1750	-10,0yrs	0.03097	0.00395	0.02495	0.00397
FM	1760	-10,0yrs	0.02847	0.00348	0.02924	0.0035
FM	1770	-10,0yrs	0.02903	0.0031	0.03398	0.00314
FM	1780	-10,0yrs	0.03062	0.00271	0.02755	0.00272
FM	1790	-10,0yrs	0.0285	0.00229	0.02996	0.00229
FM	1800	-10,0yrs	0.03039	0.00192	0.02731	0.00192
FM	1810	-10,0yrs	0.02875	0.00166	0.02889	0.00165
FM	1820	-10,0yrs	0.02631	0.00142	0.02718	0.00142
FM	1830	-10,0yrs	0.02495	0.00123	0.02373	0.00123
FM	1840	-10,0yrs	0.02051	0.00111	0.02121	0.00111
FM	1850	-10,0yrs	0.01973	0.001	0.0178	0.001
FM	1860	-10,0yrs	0.01692	0.00091	0.01451	0.00091
FM	1870	-10,0yrs	0.01553	0.00082	0.01381	0.00082
FM	1880	-10,0yrs	0.01519	0.00076	0.01633	0.00076
FM	1890	-10,0yrs	0.0181	0.00073	0.01929	0.00073
FM	1900	-10,0yrs	0.02212	0.00073	0.02297	0.00073
FM	1910	-10,0yrs	0.02339	0.00073	0.02394	0.00074
FM	1920	-10,0yrs	0.02342	0.00085	0.02019	0.00087
FM	1700	-30,-20yrs	0.01823	0.01186	0.01779	0.01244
FM	1710	-30,-20yrs	-0.00147	0.0109	0.01388	0.01111
FM	1720	-30,-20yrs	0.0153	0.00994	0.01205	0.00983
FM	1730	-30,-20yrs	0.01571	0.00925	0.01346	0.00936
FM	1740	-30,-20yrs	0.01689	0.00831	0.02526	0.00836
FM	1750	-30,-20yrs	0.02028	0.00742	0.02356	0.0075
FM	1760	-30,-20yrs	0.03507	0.0066	0.02419	0.00669
FM	1770	-30,-20yrs	0.02893	0.00583	0.02522	0.00591
FM	1780	-30,-20yrs	0.0252	0.00505	0.03463	0.00512
FM	1790	-30,-20yrs	0.02299	0.00435	0.0275	0.0044
FM	1800	-30,-20yrs	0.0205	0.00374	0.0164	0.00376
FM	1810	-30,-20yrs	0.0277	0.00322	0.02315	0.00322
FM	1820	-30,-20yrs	0.02362	0.00275	0.02218	0.00276
FM	1830	-30,-20yrs	0.0215	0.00237	0.0213	0.00238
FM	1840	-30,-20yrs	0.01782	0.00207	0.01684	0.00209
FM	1850	-30,-20yrs	0.0162	0.00191	0.01915	0.00191
FM	1860	-30,-20yrs	0.01643	0.00177	0.01255	0.00176
FM	1870	-30,-20yrs	0.00932	0.00157	0.01078	0.00157
FM	1880	-30,-20yrs	0.01116	0.00149	0.01033	0.0015
FM	1890	-30,-20yrs	0.01196	0.0014	0.01303	0.00142
FM	1900	-30,-20yrs	0.01293	0.00139	0.01547	0.00139
FM	1910	-30,-20yrs	0.01561	0.0014	0.01442	0.00141
FM	1920	-30,-20yrs	0.01082	0.0016	0.00712	0.00164
MF	1700	-30,-20yrs	0.02059	0.01171	0.00279	0.01228
MF	1710	-30,-20yrs	0.01551	0.01093	0.02294	0.0114
MF	1720	-30,-20yrs	0.01895	0.00983	0.0189	0.01005
MF	1730	-30,-20yrs	0.03684	0.00932	0.01509	0.00941
MF	1740	-30,-20yrs	-0.00536	0.00815	0.01775	0.00835
MF	1750	-30,-20yrs	0.00496	0.00728	0.02686	0.00747
MF	1760	-30,-20yrs	0.02641	0.00665	0.02339	0.00672
MF	1770	-30,-20yrs	0.01812	0.00596	0.02354	0.00603
MF	1780	-30,-20yrs	0.02809	0.00513	0.02071	0.00519
MF	1790	-30,-20yrs	0.02578	0.00437	0.02338	0.00436
MF	1800	-30,-20yrs	0.02027	0.00373	0.02178	0.00378
MF	1810	-30,-20yrs	0.02017	0.00322	0.02299	0.00326
MF	1820	-30,-20yrs	0.02179	0.00282	0.0254	0.00282
MF	1830	-30,-20yrs	0.02726	0.00247	0.02012	0.00247
MF	1840	-30,-20yrs	0.01563	0.00216	0.01333	0.00216
MF	1850	-30,-20yrs	0.01628	0.00192	0.01606	0.00193
MF	1860	-30,-20yrs	0.0135	0.00176	0.01249	0.00174
MF	1870	-30,-20yrs	0.01524	0.00159	0.01302	0.00159
MF	1880	-30,-20yrs	0.01244	0.00151	0.01422	0.00152
MF	1890	-30,-20yrs	0.01479	0.00143	0.01445	0.00144
MF	1900	-30,-20yrs	0.01558	0.0014	0.01483	0.0014
MF	1910	-30,-20yrs	0.01726	0.00141	0.01874	0.00142
MF	1920	-30,-20yrs	0.01515	0.00155	0.01011	0.00158
FF	1700	-30,-20yrs	0.01545	0.01251	0.01417	0.01329
FF	1710	-30,-20yrs	0.02068	0.01158	0.01252	0.0119
FF	1720	-30,-20yrs	0.02317	0.01076	0.02451	0.01069
FF	1730	-30,-20yrs	0.02297	0.01008	0.02231	0.01015
FF	1740	-30,-20yrs	0.03504	0.00904	0.01846	0.00908
FF	1750	-30,-20yrs	0.02621	0.00821	0.03068	0.00833
FF	1760	-30,-20yrs	0.02924	0.00744	0.03742	0.00755
FF	1770	-30,-20yrs	0.04043	0.00664	0.022	0.00673
FF	1780	-30,-20yrs	0.04005	0.00572	0.03578	0.00582
FF	1790	-30,-20yrs	0.03564	0.00487	0.03194	0.00494
FF	1800	-30,-20yrs	0.02081	0.0042	0.02606	0.00423
FF	1810	-30,-20yrs	0.02849	0.00364	0.03251	0.00363
FF	1820	-30,-20yrs	0.02416	0.00311	0.03051	0.0031
FF	1830	-30,-20yrs	0.02615	0.00265	0.02818	0.00267
FF	1840	-30,-20yrs	0.01687	0.0023	0.01866	0.00231
FF	1850	-30,-20yrs	0.01885	0.00206	0.01886	0.00206
FF	1860	-30,-20yrs	0.01656	0.00186	0.01634	0.00185
FF	1870	-30,-20yrs	0.01465	0.00167	0.01589	0.00168
FF	1880	-30,-20yrs	0.01608	0.00157	0.01698	0.00158
FF	1890	-30,-20yrs	0.01594	0.00147	0.01924	0.00148
FF	1900	-30,-20yrs	0.01686	0.00145	0.01837	0.00145
FF	1910	-30,-20yrs	0.01697	0.00145	0.01716	0.00146
FF	1920	-30,-20yrs	0.00729	0.00164	0.00669	0.00169
MM	1700	-30,-20yrs	0.03456	0.01079	0.01932	0.01115
MM	1710	-30,-20yrs	0.02024	0.00997	0.01843	0.01035
MM	1720	-30,-20yrs	0.02186	0.00884	0.01524	0.0091
MM	1730	-30,-20yrs	0.02879	0.00836	0.01652	0.00852
MM	1740	-30,-20yrs	0.01033	0.00731	0.02686	0.00753
MM	1750	-30,-20yrs	0.02829	0.00646	0.0249	0.00663
MM	1760	-30,-20yrs	0.02712	0.00593	0.01821	0.00596
MM	1770	-30,-20yrs	0.02062	0.00517	0.0289	0.00523
MM	1780	-30,-20yrs	0.02589	0.00446	0.02016	0.00453
MM	1790	-30,-20yrs	0.01862	0.00385	0.02168	0.00387
MM	1800	-30,-20yrs	0.02486	0.00329	0.02824	0.00333
MM	1810	-30,-20yrs	0.02054	0.00285	0.02049	0.00288
MM	1820	-30,-20yrs	0.02721	0.00249	0.02618	0.00248
MM	1830	-30,-20yrs	0.02259	0.0022	0.02597	0.0022
MM	1840	-30,-20yrs	0.02134	0.00195	0.01604	0.00195
MM	1850	-30,-20yrs	0.01668	0.00177	0.01729	0.00178
MM	1860	-30,-20yrs	0.01811	0.00167	0.01797	0.00164
MM	1870	-30,-20yrs	0.01982	0.00149	0.0169	0.00149
MM	1880	-30,-20yrs	0.01924	0.00142	0.01748	0.00143
MM	1890	-30,-20yrs	0.02024	0.00136	0.01798	0.00137
MM	1900	-30,-20yrs	0.01789	0.00134	0.01907	0.00135
MM	1910	-30,-20yrs	0.02244	0.00136	0.02323	0.00137
MM	1920	-30,-20yrs	0.01889	0.00151	0.01659	0.00154
FF	1700	-20,-10yrs	0.02164	0.00869	0.03338	0.00889
FF	1710	-20,-10yrs	0.03599	0.00776	0.03469	0.00789
FF	1720	-20,-10yrs	0.03919	0.00732	0.03924	0.00729
FF	1730	-20,-10yrs	0.03756	0.00668	0.03399	0.00672
FF	1740	-20,-10yrs	0.03713	0.006	0.04159	0.00609
FF	1750	-20,-10yrs	0.04142	0.0055	0.0406	0.00557
FF	1760	-20,-10yrs	0.03662	0.00496	0.03701	0.00496
FF	1770	-20,-10yrs	0.03528	0.00436	0.04148	0.00441
FF	1780	-20,-10yrs	0.0408	0.00381	0.04357	0.00384
FF	1790	-20,-10yrs	0.03466	0.00327	0.0352	0.00327
FF	1800	-20,-10yrs	0.03319	0.00277	0.03641	0.00277
FF	1810	-20,-10yrs	0.03328	0.00237	0.03256	0.00236
FF	1820	-20,-10yrs	0.03427	0.00202	0.03085	0.00202
FF	1830	-20,-10yrs	0.02824	0.00172	0.02644	0.00172
FF	1840	-20,-10yrs	0.02192	0.0015	0.02226	0.0015
FF	1850	-20,-10yrs	0.01831	0.00134	0.0195	0.00134
FF	1860	-20,-10yrs	0.01894	0.00122	0.01839	0.00121
FF	1870	-20,-10yrs	0.01888	0.00109	0.01921	0.0011
FF	1880	-20,-10yrs	0.02026	0.00102	0.01873	0.00102
FF	1890	-20,-10yrs	0.02154	0.00094	0.02197	0.00095
FF	1900	-20,-10yrs	0.02066	0.00093	0.02316	0.00093
FF	1910	-20,-10yrs	0.0197	0.00094	0.02073	0.00095
FF	1920	-20,-10yrs	0.01448	0.00105	0.01459	0.00108
MM	1700	-10,0yrs	0.0294	0.00591	0.01947	0.00606
MM	1710	-10,0yrs	0.02719	0.00544	0.02869	0.00556
MM	1720	-10,0yrs	0.02841	0.00497	0.03463	0.00501
MM	1730	-10,0yrs	0.0325	0.0044	0.03368	0.0045
MM	1740	-10,0yrs	0.02913	0.00399	0.03355	0.00404
MM	1750	-10,0yrs	0.0355	0.00349	0.03475	0.00357
MM	1760	-10,0yrs	0.03576	0.00312	0.03569	0.00315
MM	1770	-10,0yrs	0.02688	0.00278	0.02801	0.0028
MM	1780	-10,0yrs	0.03096	0.00243	0.02878	0.00244
MM	1790	-10,0yrs	0.02984	0.00204	0.03242	0.00204
MM	1800	-10,0yrs	0.0343	0.00172	0.03243	0.00172
MM	1810	-10,0yrs	0.03128	0.0015	0.03056	0.0015
MM	1820	-10,0yrs	0.03358	0.0013	0.03353	0.00129
MM	1830	-10,0yrs	0.03624	0.00115	0.03375	0.00115
MM	1840	-10,0yrs	0.02817	0.00105	0.0281	0.00105
MM	1850	-10,0yrs	0.02726	0.00094	0.02803	0.00094
MM	1860	-10,0yrs	0.0248	0.00086	0.02366	0.00086
MM	1870	-10,0yrs	0.02275	0.00078	0.02215	0.00078
MM	1880	-10,0yrs	0.02745	0.00073	0.02641	0.00074
MM	1890	-10,0yrs	0.02853	0.0007	0.02911	0.00071
MM	1900	-10,0yrs	0.03186	0.00071	0.03156	0.00071
MM	1910	-10,0yrs	0.03608	0.00071	0.03549	0.00072
MM	1920	-10,0yrs	0.03161	0.0008	0.03033	0.00081
MM	1700	-20,-10yrs	0.0267	0.00747	0.02598	0.00779
MM	1710	-20,-10yrs	0.0208	0.00672	0.01847	0.00682
MM	1720	-20,-10yrs	0.02773	0.00617	0.03001	0.00626
MM	1730	-20,-10yrs	0.02517	0.00555	0.0256	0.00568
MM	1740	-20,-10yrs	0.02282	0.00492	0.02389	0.00504
MM	1750	-20,-10yrs	0.02875	0.00444	0.03139	0.0045
MM	1760	-20,-10yrs	0.03125	0.00392	0.02649	0.00397
MM	1770	-20,-10yrs	0.03033	0.00348	0.02905	0.00349
MM	1780	-20,-10yrs	0.02158	0.00305	0.02275	0.00307
MM	1790	-20,-10yrs	0.02558	0.0026	0.02594	0.00261
MM	1800	-20,-10yrs	0.02746	0.00221	0.03033	0.00221
MM	1810	-20,-10yrs	0.02625	0.00189	0.02843	0.0019
MM	1820	-20,-10yrs	0.0313	0.00165	0.02976	0.00165
MM	1830	-20,-10yrs	0.03011	0.00145	0.03033	0.00145
MM	1840	-20,-10yrs	0.02154	0.0013	0.0218	0.0013
MM	1850	-20,-10yrs	0.02347	0.00119	0.02319	0.00119
MM	1860	-20,-10yrs	0.02304	0.00108	0.02219	0.00107
MM	1870	-20,-10yrs	0.02122	0.00098	0.02111	0.00099
MM	1880	-20,-10yrs	0.02196	0.00093	0.02257	0.00093
MM	1890	-20,-10yrs	0.02411	0.00088	0.0225	0.00088
MM	1900	-20,-10yrs	0.02619	0.00087	0.02563	0.00087
MM	1910	-20,-10yrs	0.02976	0.00089	0.02863	0.0009
MM	1920	-20,-10yrs	0.02619	0.00096	0.02574	0.00098
FF	1700	-10,0yrs	0.04207	0.0069	0.0348	0.00704
FF	1710	-10,0yrs	0.03437	0.00637	0.03845	0.00644
FF	1720	-10,0yrs	0.03977	0.00582	0.03797	0.00586
FF	1730	-10,0yrs	0.03862	0.00527	0.04348	0.00533
FF	1740	-10,0yrs	0.04032	0.00485	0.035	0.00491
FF	1750	-10,0yrs	0.04421	0.00441	0.04875	0.00442
FF	1760	-10,0yrs	0.04525	0.00388	0.03868	0.0039
FF	1770	-10,0yrs	0.04487	0.00345	0.04929	0.0035
FF	1780	-10,0yrs	0.03939	0.00302	0.04338	0.00303
FF	1790	-10,0yrs	0.03952	0.00255	0.04073	0.00254
FF	1800	-10,0yrs	0.03691	0.00215	0.03792	0.00215
FF	1810	-10,0yrs	0.03815	0.00185	0.03626	0.00184
FF	1820	-10,0yrs	0.0334	0.00157	0.03243	0.00156
FF	1830	-10,0yrs	0.02796	0.00134	0.02833	0.00134
FF	1840	-10,0yrs	0.02234	0.00118	0.02356	0.00118
FF	1850	-10,0yrs	0.02088	0.00106	0.02113	0.00106
FF	1860	-10,0yrs	0.02203	0.00096	0.02017	0.00096
FF	1870	-10,0yrs	0.02166	0.00086	0.02107	0.00086
FF	1880	-10,0yrs	0.02396	0.0008	0.02326	0.0008
FF	1890	-10,0yrs	0.02587	0.00075	0.02467	0.00076
FF	1900	-10,0yrs	0.02627	0.00075	0.02645	0.00076
FF	1910	-10,0yrs	0.02611	0.00075	0.02479	0.00076
FF	1920	-10,0yrs	0.0291	0.00087	0.02905	0.0009
PANEL C	1st cousins in-law
Mean obs. diff (norm):		0.02841
S.D. of obs. diff. (norm):		0.87401
Genders	Birth decade	Birth offset	Est(even)	SE(even)	Est(odd)	SE(odd)
MM	1700	-20,-10yrs	0.01855	0.00566	0.01607	0.00584
MM	1710	-20,-10yrs	0.01621	0.00514	0.01749	0.00521
MM	1720	-20,-10yrs	0.02438	0.00468	0.02501	0.00477
MM	1730	-20,-10yrs	0.02731	0.00426	0.01772	0.00436
MM	1740	-20,-10yrs	0.02002	0.00383	0.02784	0.00391
MM	1750	-20,-10yrs	0.02358	0.00344	0.02783	0.00351
MM	1760	-20,-10yrs	0.03057	0.00306	0.02605	0.0031
MM	1770	-20,-10yrs	0.02777	0.00272	0.02785	0.00274
MM	1780	-20,-10yrs	0.02381	0.00241	0.02385	0.00243
MM	1790	-20,-10yrs	0.02462	0.00206	0.02559	0.00206
MM	1800	-20,-10yrs	0.02339	0.00175	0.02546	0.00176
MM	1810	-20,-10yrs	0.02367	0.00149	0.02367	0.0015
MM	1820	-20,-10yrs	0.02542	0.00129	0.02674	0.00129
MM	1830	-20,-10yrs	0.02549	0.00113	0.02226	0.00112
MM	1840	-20,-10yrs	0.01739	0.001	0.01741	0.001
MM	1850	-20,-10yrs	0.0181	0.00091	0.01589	0.00091
MM	1860	-20,-10yrs	0.01609	0.00084	0.01623	0.00083
MM	1870	-20,-10yrs	0.01371	0.00076	0.01346	0.00076
MM	1880	-20,-10yrs	0.01257	0.00072	0.01261	0.00072
MM	1890	-20,-10yrs	0.01218	0.00068	0.01281	0.00068
MM	1900	-20,-10yrs	0.01213	0.00067	0.01186	0.00067
MM	1910	-20,-10yrs	0.01386	0.00068	0.01317	0.00069
MM	1920	-20,-10yrs	0.01134	0.00074	0.01092	0.00075
MF	1700	-10,0yrs	0.01444	0.00507	0.01354	0.00519
MF	1710	-10,0yrs	0.02102	0.00473	0.02005	0.00477
MF	1720	-10,0yrs	0.0179	0.00422	0.02614	0.00429
MF	1730	-10,0yrs	0.02069	0.00383	0.02284	0.0039
MF	1740	-10,0yrs	0.02062	0.00348	0.01599	0.00354
MF	1750	-10,0yrs	0.02484	0.00311	0.02327	0.00315
MF	1760	-10,0yrs	0.02902	0.00277	0.02157	0.0028
MF	1770	-10,0yrs	0.02361	0.00245	0.02467	0.00246
MF	1780	-10,0yrs	0.02241	0.00213	0.02028	0.00215
MF	1790	-10,0yrs	0.02423	0.00179	0.02333	0.0018
MF	1800	-10,0yrs	0.02246	0.00152	0.02263	0.00152
MF	1810	-10,0yrs	0.0213	0.00131	0.02341	0.00131
MF	1820	-10,0yrs	0.01997	0.00114	0.02129	0.00113
MF	1830	-10,0yrs	0.0177	0.001	0.01728	0.00099
MF	1840	-10,0yrs	0.01297	0.0009	0.01288	0.00089
MF	1850	-10,0yrs	0.01162	0.00081	0.01168	0.00081
MF	1860	-10,0yrs	0.0106	0.00075	0.00946	0.00074
MF	1870	-10,0yrs	0.0087	0.00068	0.00793	0.00068
MF	1880	-10,0yrs	0.00775	0.00063	0.00664	0.00063
MF	1890	-10,0yrs	0.01043	0.0006	0.00991	0.00061
MF	1900	-10,0yrs	0.01221	0.0006	0.01224	0.0006
MF	1910	-10,0yrs	0.01447	0.00061	0.01396	0.00061
MF	1920	-10,0yrs	0.01667	0.00068	0.0189	0.0007
MF	1700	-30,-20yrs	-0.00128	0.00824	-0.00032	0.00866
MF	1710	-30,-20yrs	-0.00154	0.00791	0.02209	0.00799
MF	1720	-30,-20yrs	0.02099	0.00689	0.01498	0.00714
MF	1730	-30,-20yrs	0.00307	0.00658	0.01792	0.00676
MF	1740	-30,-20yrs	0.01542	0.00592	0.01516	0.00605
MF	1750	-30,-20yrs	0.01936	0.00526	0.01943	0.0054
MF	1760	-30,-20yrs	0.02187	0.00485	0.02511	0.00492
MF	1770	-30,-20yrs	0.02393	0.00437	0.02723	0.00442
MF	1780	-30,-20yrs	0.01928	0.00382	0.01991	0.00388
MF	1790	-30,-20yrs	0.01531	0.00326	0.01746	0.00329
MF	1800	-30,-20yrs	0.0209	0.00283	0.0149	0.00288
MF	1810	-30,-20yrs	0.01487	0.00247	0.02005	0.0025
MF	1820	-30,-20yrs	0.01268	0.00217	0.01887	0.00216
MF	1830	-30,-20yrs	0.01521	0.00191	0.018	0.00191
MF	1840	-30,-20yrs	0.00893	0.00168	0.00906	0.00168
MF	1850	-30,-20yrs	0.00803	0.00151	0.00934	0.00152
MF	1860	-30,-20yrs	0.00889	0.00141	0.00877	0.00139
MF	1870	-30,-20yrs	0.00921	0.00128	0.00765	0.00128
MF	1880	-30,-20yrs	0.00862	0.00122	0.0058	0.00123
MF	1890	-30,-20yrs	0.00653	0.00117	0.00721	0.00117
MF	1900	-30,-20yrs	0.00958	0.00114	0.00936	0.00115
MF	1910	-30,-20yrs	0.01095	0.00116	0.01189	0.00117
MF	1920	-30,-20yrs	0.0085	0.00128	0.00639	0.00131
FM	1700	-30,-20yrs	0.01754	0.00679	0.01123	0.00706
FM	1710	-30,-20yrs	0.0129	0.00624	0.01149	0.00636
FM	1720	-30,-20yrs	0.01448	0.00557	0.01572	0.00563
FM	1730	-30,-20yrs	0.01055	0.00518	0.02225	0.00529
FM	1740	-30,-20yrs	0.02037	0.0047	0.02538	0.00479
FM	1750	-30,-20yrs	0.02043	0.00423	0.03096	0.00428
FM	1760	-30,-20yrs	0.02095	0.00377	0.02461	0.00384
FM	1770	-30,-20yrs	0.0243	0.00333	0.02539	0.00337
FM	1780	-30,-20yrs	0.02303	0.00292	0.02535	0.00296
FM	1790	-30,-20yrs	0.02509	0.00256	0.02166	0.00258
FM	1800	-30,-20yrs	0.02214	0.0022	0.01731	0.00222
FM	1810	-30,-20yrs	0.02015	0.00189	0.02112	0.0019
FM	1820	-30,-20yrs	0.02136	0.00161	0.02195	0.00161
FM	1830	-30,-20yrs	0.01695	0.00139	0.01688	0.00139
FM	1840	-30,-20yrs	0.013	0.00121	0.01325	0.00122
FM	1850	-30,-20yrs	0.01082	0.00111	0.01282	0.00111
FM	1860	-30,-20yrs	0.01089	0.00103	0.00766	0.00102
FM	1870	-30,-20yrs	0.00603	0.00092	0.00615	0.00092
FM	1880	-30,-20yrs	0.00597	0.00086	0.00473	0.00087
FM	1890	-30,-20yrs	0.0062	0.00082	0.00649	0.00083
FM	1900	-30,-20yrs	0.0083	0.00081	0.00802	0.00081
FM	1910	-30,-20yrs	0.00817	0.00082	0.00945	0.00083
FM	1920	-30,-20yrs	0.00541	0.00093	0.0052	0.00096
FF	1700	-20,-10yrs	0.02978	0.00609	0.03	0.0063
FF	1710	-20,-10yrs	0.0228	0.00551	0.02484	0.00559
FF	1720	-20,-10yrs	0.03197	0.00505	0.02329	0.00511
FF	1730	-20,-10yrs	0.02152	0.0046	0.03265	0.00465
FF	1740	-20,-10yrs	0.02813	0.00415	0.0292	0.00423
FF	1750	-20,-10yrs	0.02558	0.00376	0.03017	0.00379
FF	1760	-20,-10yrs	0.0301	0.00335	0.02666	0.00338
FF	1770	-20,-10yrs	0.03017	0.00295	0.0314	0.00299
FF	1780	-20,-10yrs	0.02998	0.00259	0.02633	0.00261
FF	1790	-20,-10yrs	0.03029	0.00223	0.03108	0.00224
FF	1800	-20,-10yrs	0.02569	0.00189	0.02354	0.0019
FF	1810	-20,-10yrs	0.02713	0.00162	0.02365	0.00162
FF	1820	-20,-10yrs	0.02323	0.00139	0.02171	0.00139
FF	1830	-20,-10yrs	0.01727	0.0012	0.01633	0.0012
FF	1840	-20,-10yrs	0.01345	0.00106	0.01383	0.00106
FF	1850	-20,-10yrs	0.01274	0.00096	0.01109	0.00096
FF	1860	-20,-10yrs	0.01095	0.00088	0.00942	0.00087
FF	1870	-20,-10yrs	0.01115	0.00079	0.01219	0.00079
FF	1880	-20,-10yrs	0.01088	0.00074	0.01005	0.00074
FF	1890	-20,-10yrs	0.01279	0.00069	0.01379	0.0007
FF	1900	-20,-10yrs	0.0141	0.00068	0.01465	0.00068
FF	1910	-20,-10yrs	0.0124	0.00069	0.0116	0.0007
FF	1920	-20,-10yrs	0.00665	0.00077	0.0072	0.00079
MM	1700	-30,-20yrs	0.02261	0.0071	0.00633	0.00742
MM	1710	-30,-20yrs	0.02082	0.00667	0.02305	0.00682
MM	1720	-30,-20yrs	0.02306	0.00595	0.02232	0.00602
MM	1730	-30,-20yrs	0.02475	0.00548	0.01494	0.00565
MM	1740	-30,-20yrs	0.01747	0.00497	0.02331	0.00507
MM	1750	-30,-20yrs	0.02976	0.00442	0.02536	0.00454
MM	1760	-30,-20yrs	0.02601	0.00404	0.02273	0.00408
MM	1770	-30,-20yrs	0.02406	0.00358	0.02486	0.00359
MM	1780	-30,-20yrs	0.02354	0.00312	0.02635	0.00317
MM	1790	-30,-20yrs	0.02292	0.00271	0.01979	0.00273
MM	1800	-30,-20yrs	0.01852	0.00235	0.02016	0.00238
MM	1810	-30,-20yrs	0.01995	0.00204	0.02467	0.00205
MM	1820	-30,-20yrs	0.02333	0.00175	0.02343	0.00174
MM	1830	-30,-20yrs	0.02115	0.00153	0.02356	0.00153
MM	1840	-30,-20yrs	0.0131	0.00134	0.01305	0.00134
MM	1850	-30,-20yrs	0.01463	0.0012	0.01412	0.00121
MM	1860	-30,-20yrs	0.01485	0.00113	0.01247	0.00112
MM	1870	-30,-20yrs	0.01396	0.00101	0.01254	0.00102
MM	1880	-30,-20yrs	0.01197	0.00096	0.01268	0.00097
MM	1890	-30,-20yrs	0.01045	0.00092	0.0102	0.00093
MM	1900	-30,-20yrs	0.00992	0.00091	0.01083	0.00092
MM	1910	-30,-20yrs	0.01109	0.00092	0.01159	0.00093
MM	1920	-30,-20yrs	0.00824	0.00102	0.00791	0.00105
FM	1700	-20,-10yrs	0.01304	0.00551	0.01443	0.00573
FM	1710	-20,-10yrs	0.01752	0.00493	0.02111	0.00503
FM	1720	-20,-10yrs	0.01762	0.00453	0.02193	0.00462
FM	1730	-20,-10yrs	0.01876	0.00413	0.02646	0.0042
FM	1740	-20,-10yrs	0.02654	0.00373	0.02455	0.00381
FM	1750	-20,-10yrs	0.02446	0.00336	0.0235	0.00341
FM	1760	-20,-10yrs	0.02661	0.00297	0.02575	0.00301
FM	1770	-20,-10yrs	0.02673	0.00262	0.02389	0.00266
FM	1780	-20,-10yrs	0.02363	0.00232	0.02542	0.00235
FM	1790	-20,-10yrs	0.02305	0.00201	0.02447	0.00201
FM	1800	-20,-10yrs	0.02271	0.0017	0.02178	0.0017
FM	1810	-20,-10yrs	0.02259	0.00144	0.0215	0.00144
FM	1820	-20,-10yrs	0.02114	0.00124	0.02108	0.00124
FM	1830	-20,-10yrs	0.01772	0.00108	0.01774	0.00107
FM	1840	-20,-10yrs	0.01423	0.00096	0.01505	0.00096
FM	1850	-20,-10yrs	0.01312	0.00087	0.01245	0.00087
FM	1860	-20,-10yrs	0.00876	0.00079	0.00898	0.00079
FM	1870	-20,-10yrs	0.00676	0.00072	0.00585	0.00072
FM	1880	-20,-10yrs	0.00626	0.00068	0.00716	0.00068
FM	1890	-20,-10yrs	0.0076	0.00064	0.00769	0.00064
FM	1900	-20,-10yrs	0.00933	0.00063	0.01052	0.00063
FM	1910	-20,-10yrs	0.01083	0.00063	0.01058	0.00064
FM	1920	-20,-10yrs	0.00668	0.00071	0.00604	0.00073
FM	1700	-10,0yrs	0.02374	0.00481	0.01471	0.00493
FM	1710	-10,0yrs	0.01654	0.00443	0.02295	0.00452
FM	1720	-10,0yrs	0.02719	0.00402	0.02019	0.00408
FM	1730	-10,0yrs	0.02943	0.00363	0.02594	0.00368
FM	1740	-10,0yrs	0.02051	0.00332	0.02175	0.00338
FM	1750	-10,0yrs	0.02667	0.00295	0.02427	0.00298
FM	1760	-10,0yrs	0.03025	0.00261	0.02597	0.00264
FM	1770	-10,0yrs	0.02395	0.00232	0.02426	0.00236
FM	1780	-10,0yrs	0.02333	0.00204	0.02539	0.00205
FM	1790	-10,0yrs	0.02389	0.00172	0.02448	0.00172
FM	1800	-10,0yrs	0.02396	0.00145	0.02404	0.00145
FM	1810	-10,0yrs	0.0231	0.00125	0.02193	0.00124
FM	1820	-10,0yrs	0.02187	0.00107	0.02112	0.00107
FM	1830	-10,0yrs	0.01849	0.00094	0.01662	0.00094
FM	1840	-10,0yrs	0.01481	0.00085	0.01335	0.00085
FM	1850	-10,0yrs	0.01351	0.00077	0.0126	0.00077
FM	1860	-10,0yrs	0.01009	0.00071	0.00882	0.0007
FM	1870	-10,0yrs	0.00819	0.00064	0.00721	0.00064
FM	1880	-10,0yrs	0.00697	0.0006	0.00855	0.0006
FM	1890	-10,0yrs	0.00951	0.00057	0.00941	0.00058
FM	1900	-10,0yrs	0.01153	0.00057	0.01188	0.00057
FM	1910	-10,0yrs	0.01248	0.00057	0.01258	0.00058
FM	1920	-10,0yrs	0.01312	0.00065	0.01294	0.00067
MM	1700	-10,0yrs	0.01962	0.00481	0.01976	0.00494
MM	1710	-10,0yrs	0.02695	0.00449	0.02188	0.00455
MM	1720	-10,0yrs	0.02451	0.00402	0.02808	0.00412
MM	1730	-10,0yrs	0.0189	0.00365	0.01924	0.00372
MM	1740	-10,0yrs	0.02564	0.00332	0.02044	0.00338
MM	1750	-10,0yrs	0.02769	0.00292	0.03254	0.00297
MM	1760	-10,0yrs	0.03435	0.00261	0.03168	0.00263
MM	1770	-10,0yrs	0.02476	0.00234	0.02774	0.00235
MM	1780	-10,0yrs	0.02609	0.00204	0.02703	0.00205
MM	1790	-10,0yrs	0.02623	0.00171	0.02531	0.00171
MM	1800	-10,0yrs	0.02665	0.00145	0.02572	0.00145
MM	1810	-10,0yrs	0.02482	0.00125	0.02369	0.00125
MM	1820	-10,0yrs	0.02575	0.00108	0.02663	0.00107
MM	1830	-10,0yrs	0.02755	0.00095	0.02564	0.00095
MM	1840	-10,0yrs	0.01982	0.00086	0.02001	0.00086
MM	1850	-10,0yrs	0.02036	0.00077	0.0195	0.00077
MM	1860	-10,0yrs	0.01714	0.00071	0.01485	0.00071
MM	1870	-10,0yrs	0.01311	0.00065	0.0135	0.00065
MM	1880	-10,0yrs	0.01515	0.00061	0.01513	0.00061
MM	1890	-10,0yrs	0.01439	0.00058	0.01357	0.00059
MM	1900	-10,0yrs	0.01385	0.00058	0.01409	0.00058
MM	1910	-10,0yrs	0.01692	0.00059	0.01655	0.00059
MM	1920	-10,0yrs	0.01559	0.00065	0.01631	0.00067
MF	1700	-20,-10yrs	0.00923	0.0062	0.01024	0.00645
MF	1710	-20,-10yrs	0.02096	0.00572	0.0163	0.00573
MF	1720	-20,-10yrs	0.01778	0.00519	0.01865	0.00531
MF	1730	-20,-10yrs	0.01361	0.00472	0.01494	0.00485
MF	1740	-20,-10yrs	0.01646	0.00424	0.02224	0.00433
MF	1750	-20,-10yrs	0.01914	0.00382	0.01951	0.0039
MF	1760	-20,-10yrs	0.02416	0.00345	0.02499	0.00349
MF	1770	-20,-10yrs	0.02244	0.00306	0.02299	0.00308
MF	1780	-20,-10yrs	0.02384	0.00267	0.02044	0.0027
MF	1790	-20,-10yrs	0.01997	0.00228	0.02312	0.00229
MF	1800	-20,-10yrs	0.02175	0.00195	0.01962	0.00196
MF	1810	-20,-10yrs	0.02046	0.00167	0.02273	0.00168
MF	1820	-20,-10yrs	0.01908	0.00146	0.02266	0.00145
MF	1830	-20,-10yrs	0.01965	0.00127	0.01611	0.00127
MF	1840	-20,-10yrs	0.00857	0.00113	0.0115	0.00113
MF	1850	-20,-10yrs	0.01088	0.00102	0.01047	0.00102
MF	1860	-20,-10yrs	0.00991	0.00094	0.00952	0.00093
MF	1870	-20,-10yrs	0.00887	0.00085	0.00898	0.00086
MF	1880	-20,-10yrs	0.00674	0.0008	0.00717	0.0008
MF	1890	-20,-10yrs	0.00781	0.00075	0.00801	0.00076
MF	1900	-20,-10yrs	0.00963	0.00074	0.01071	0.00075
MF	1910	-20,-10yrs	0.01448	0.00076	0.0131	0.00076
MF	1920	-20,-10yrs	0.00955	0.00082	0.01089	0.00084
FF	1700	-10,0yrs	0.0319	0.00516	0.0302	0.00528
FF	1710	-10,0yrs	0.03016	0.00474	0.02658	0.00482
FF	1720	-10,0yrs	0.0308	0.00432	0.03403	0.00435
FF	1730	-10,0yrs	0.02961	0.00389	0.03434	0.00395
FF	1740	-10,0yrs	0.02966	0.00356	0.02677	0.00363
FF	1750	-10,0yrs	0.03258	0.0032	0.03598	0.00324
FF	1760	-10,0yrs	0.03707	0.00281	0.0284	0.00284
FF	1770	-10,0yrs	0.03259	0.00248	0.03148	0.00252
FF	1780	-10,0yrs	0.03184	0.00218	0.03079	0.00219
FF	1790	-10,0yrs	0.02876	0.00184	0.02812	0.00184
FF	1800	-10,0yrs	0.02779	0.00155	0.0262	0.00155
FF	1810	-10,0yrs	0.02603	0.00133	0.02357	0.00133
FF	1820	-10,0yrs	0.02171	0.00115	0.02236	0.00114
FF	1830	-10,0yrs	0.01826	0.001	0.01824	0.001
FF	1840	-10,0yrs	0.01508	0.00089	0.01351	0.00089
FF	1850	-10,0yrs	0.01334	0.00081	0.012	0.00081
FF	1860	-10,0yrs	0.01213	0.00074	0.012	0.00074
FF	1870	-10,0yrs	0.01297	0.00067	0.01283	0.00067
FF	1880	-10,0yrs	0.0132	0.00062	0.01355	0.00062
FF	1890	-10,0yrs	0.01552	0.00059	0.01553	0.00059
FF	1900	-10,0yrs	0.01503	0.00059	0.01587	0.00059
FF	1910	-10,0yrs	0.01484	0.00059	0.0139	0.0006
FF	1920	-10,0yrs	0.02034	0.00068	0.02222	0.0007
FF	1700	-30,-20yrs	0.007	0.0078	0.01961	0.00814
FF	1710	-30,-20yrs	0.01278	0.00718	0.02282	0.00735
FF	1720	-30,-20yrs	0.02553	0.00647	0.02993	0.00648
FF	1730	-30,-20yrs	0.01662	0.00603	0.03154	0.00612
FF	1740	-30,-20yrs	0.02285	0.00545	0.02534	0.00554
FF	1750	-30,-20yrs	0.02665	0.0049	0.02674	0.00494
FF	1760	-30,-20yrs	0.02647	0.00441	0.03405	0.00446
FF	1770	-30,-20yrs	0.03303	0.00394	0.03015	0.00401
FF	1780	-30,-20yrs	0.03112	0.00345	0.0356	0.0035
FF	1790	-30,-20yrs	0.02873	0.00298	0.0257	0.003
FF	1800	-30,-20yrs	0.02295	0.00258	0.02067	0.00261
FF	1810	-30,-20yrs	0.02382	0.00222	0.02201	0.00223
FF	1820	-30,-20yrs	0.02073	0.0019	0.01945	0.0019
FF	1830	-30,-20yrs	0.01766	0.00164	0.01677	0.00165
FF	1840	-30,-20yrs	0.01255	0.00145	0.01182	0.00145
FF	1850	-30,-20yrs	0.01027	0.00131	0.01024	0.00131
FF	1860	-30,-20yrs	0.00848	0.00119	0.00645	0.00119
FF	1870	-30,-20yrs	0.00737	0.00107	0.00968	0.00108
FF	1880	-30,-20yrs	0.00913	0.00101	0.00965	0.00102
FF	1890	-30,-20yrs	0.00962	0.00097	0.00974	0.00098
FF	1900	-30,-20yrs	0.00964	0.00095	0.013	0.00095
FF	1910	-30,-20yrs	0.01034	0.00095	0.00928	0.00096
FF	1920	-30,-20yrs	0.00245	0.00109	0.00266	0.00112

## Sheet: SuppFig_S3
PANEL A
Lifespans 20-120yrs for individuals with 1+ children, 1+ spouses, and both parents are included.
Males				Females
Birth decade	Num.	Mean LS	StdDev	S.E.	Num.	Mean LS	StdDev	S.E.
1800	908000	66.522	16.087	0.01687	654000	65.201	18.277	0.0226
1810	1161000	66.373	16.256	0.01508	850000	64.974	18.519	0.02008
1820	1508000	66.024	16.731	0.01362	1146000	65.096	18.826	0.01757
1830	1867000	66.052	17.051	0.01247	1515000	65.459	18.874	0.01533
1840	2280000	67.175	16.289	0.01078	1907000	66.099	18.686	0.01353
1850	2808000	67.843	15.973	0.00953	2330000	66.98	18.521	0.01213
1860	3241000	68.617	15.811	0.00878	2773000	68.426	18.244	0.01095
1870	3890000	69.387	15.889	0.00805	3384000	70.013	18.377	0.00999
1880	4346000	70.003	15.941	0.00764	3853000	72.421	18.284	0.00931
1890	4746000	70.844	15.324	0.00703	4316000	74.974	17.931	0.00863
1900	4760000	71.802	14.681	0.00672	4375000	77.58	16.449	0.00786
1910	4633000	72.881	14.59	0.00677	4327000	78.665	14.682	0.00705
PANEL B
Sacher estimates of age-specific hazard
Age	M-1800	F-1800	M-1810	F-1810	M-1820	F-1820	M-1830	F-1830	M-1840	F-1840	M-1850	F-1850	M-1860	F-1860	M-1870	F-1870	M-1880	F-1880	M-1890	F-1890	M-1900	F-1900	M-1910	F-1910
20	0.00031	0.00125	0.00039	0.00131	0.00036	0.00145	0.00041	0.00182	0.00068	0.00151	0.00036	0.00144	0.00036	0.00137	0.00027	0.00106	0.00025	0.00098	0.00032	0.00099	0.00018	0.00081	0.00012	0.00055
21	0.0005	0.00169	0.00054	0.00174	0.00063	0.0021	0.00068	0.00229	0.00103	0.00185	0.00061	0.00194	0.0005	0.0017	0.00048	0.00153	0.00039	0.00127	0.00055	0.00131	0.00029	0.00099	0.0002	0.00064
22	0.00062	0.00213	0.00063	0.00237	0.00083	0.00283	0.00089	0.00295	0.00128	0.00263	0.00076	0.0026	0.00055	0.00212	0.00059	0.002	0.00046	0.00161	0.00076	0.00169	0.00039	0.00122	0.00027	0.00077
23	0.00073	0.0025	0.00085	0.0027	0.00108	0.0034	0.00151	0.00349	0.00145	0.00307	0.00093	0.00307	0.00074	0.0025	0.00077	0.00234	0.00063	0.00188	0.00103	0.00207	0.00054	0.00143	0.00044	0.00088
24	0.00105	0.00307	0.00109	0.00328	0.00144	0.00398	0.00229	0.00406	0.00155	0.00353	0.00127	0.00357	0.00097	0.00293	0.00101	0.00278	0.00084	0.00225	0.00136	0.00249	0.0007	0.0016	0.00064	0.00097
25	0.00142	0.0037	0.00145	0.0039	0.00191	0.00477	0.00319	0.0046	0.00179	0.00402	0.00163	0.00408	0.00125	0.00324	0.00131	0.00318	0.00108	0.00255	0.00175	0.00279	0.00088	0.00181	0.00101	0.00109
26	0.00172	0.00406	0.00177	0.0042	0.00235	0.00526	0.00398	0.00498	0.002	0.00451	0.00193	0.00459	0.00157	0.00362	0.00156	0.00358	0.0014	0.00289	0.00204	0.00315	0.00103	0.00199	0.00139	0.00118
27	0.00196	0.0043	0.00211	0.00461	0.00266	0.00583	0.00459	0.00535	0.00238	0.005	0.00234	0.00493	0.00186	0.00392	0.00184	0.00383	0.00184	0.00307	0.0023	0.00339	0.0012	0.00216	0.0015	0.0012
28	0.00229	0.00495	0.00253	0.00543	0.00311	0.00637	0.00518	0.006	0.0027	0.00549	0.00262	0.00539	0.00215	0.0043	0.00212	0.00426	0.00239	0.00343	0.0024	0.00375	0.00143	0.00229	0.00157	0.00126
29	0.0027	0.00518	0.00291	0.00581	0.00348	0.00676	0.00554	0.00621	0.00304	0.00582	0.00296	0.0057	0.00239	0.00462	0.00241	0.00454	0.00339	0.00415	0.00195	0.00341	0.00155	0.00235	0.00166	0.00128
30	0.00319	0.00571	0.00349	0.0064	0.004	0.00737	0.00618	0.00665	0.00353	0.00632	0.00345	0.0062	0.00283	0.00489	0.00271	0.00473	0.00396	0.00464	0.00212	0.00341	0.0017	0.00243	0.00179	0.00132
31	0.00346	0.006	0.00393	0.00688	0.00417	0.00729	0.00637	0.00676	0.00394	0.0066	0.00346	0.00618	0.00319	0.00535	0.00296	0.00483	0.00422	0.00485	0.0022	0.0034	0.00184	0.00238	0.0018	0.00134
32	0.004	0.0066	0.00442	0.0077	0.00479	0.00793	0.00683	0.00725	0.00443	0.00731	0.00382	0.00649	0.00361	0.00574	0.00314	0.00511	0.00447	0.00511	0.00241	0.00359	0.00205	0.00247	0.0019	0.00137
33	0.0042	0.00688	0.00485	0.00805	0.00556	0.00789	0.00658	0.0077	0.00466	0.00753	0.00413	0.00659	0.00389	0.00603	0.00341	0.00518	0.00462	0.0052	0.00262	0.00363	0.00224	0.00249	0.00188	0.00138
34	0.0046	0.00712	0.00536	0.00854	0.00669	0.00852	0.0063	0.00784	0.00507	0.00793	0.00432	0.00681	0.0042	0.00616	0.00365	0.00541	0.00481	0.00532	0.00278	0.00372	0.00244	0.00252	0.00189	0.00141
35	0.00498	0.00784	0.00609	0.00963	0.00771	0.00899	0.0061	0.00844	0.00544	0.00826	0.00462	0.00718	0.00449	0.00659	0.00393	0.00564	0.00489	0.00549	0.00301	0.0039	0.0027	0.00264	0.00181	0.00141
36	0.00544	0.00818	0.00634	0.00992	0.00831	0.00902	0.0061	0.00861	0.0057	0.00865	0.00495	0.00747	0.00477	0.00676	0.00434	0.00583	0.00496	0.00558	0.00324	0.00405	0.00294	0.00267	0.00186	0.00147
37	0.00554	0.00865	0.00674	0.01014	0.00851	0.00944	0.0063	0.00898	0.00594	0.00891	0.00512	0.00751	0.00511	0.00699	0.00478	0.00601	0.00483	0.00552	0.00346	0.00411	0.00305	0.00268	0.00204	0.00154
38	0.00629	0.00907	0.00713	0.01056	0.00902	0.00963	0.0067	0.00967	0.00636	0.00933	0.00548	0.00784	0.00548	0.00737	0.00538	0.00629	0.00483	0.00572	0.00381	0.00415	0.00312	0.00275	0.00216	0.00157
39	0.00652	0.0095	0.00749	0.01101	0.00921	0.00997	0.00693	0.00949	0.00652	0.00952	0.00573	0.00803	0.00572	0.00745	0.00612	0.00675	0.00441	0.0055	0.004	0.00428	0.00331	0.00279	0.0024	0.00169
40	0.0079	0.01081	0.00861	0.01176	0.00979	0.01066	0.00771	0.01024	0.00724	0.00986	0.00633	0.00834	0.00611	0.00775	0.00643	0.007	0.00461	0.00553	0.0042	0.00432	0.00355	0.00287	0.00261	0.0018
41	0.00799	0.01077	0.00816	0.01094	0.00958	0.01003	0.00782	0.01032	0.00697	0.00912	0.00682	0.00859	0.00626	0.00751	0.00644	0.00691	0.00477	0.00535	0.00438	0.00412	0.0036	0.00275	0.0029	0.00186
42	0.00891	0.01163	0.00878	0.01121	0.01014	0.01071	0.00856	0.01076	0.00752	0.00929	0.00731	0.00893	0.00662	0.00749	0.00665	0.00697	0.00515	0.00556	0.00468	0.00438	0.00387	0.00294	0.00324	0.00202
43	0.00965	0.01152	0.00937	0.0111	0.01012	0.01047	0.00897	0.01064	0.00773	0.00909	0.00763	0.00869	0.00682	0.00735	0.0068	0.00698	0.00539	0.00559	0.005	0.00439	0.00413	0.00297	0.00358	0.00211
44	0.01027	0.01168	0.01022	0.01079	0.01026	0.01033	0.00936	0.01041	0.00827	0.00925	0.00801	0.00869	0.00726	0.00744	0.00689	0.00691	0.00586	0.0057	0.00529	0.00449	0.00441	0.00305	0.00396	0.00233
45	0.01154	0.01231	0.01154	0.01131	0.0106	0.01046	0.01007	0.01051	0.00864	0.00895	0.00844	0.00878	0.00758	0.00751	0.00725	0.00699	0.00622	0.00578	0.0057	0.00462	0.00472	0.00313	0.00442	0.00252
46	0.01152	0.0116	0.01147	0.01075	0.01041	0.01006	0.01018	0.01051	0.0089	0.0088	0.00895	0.00878	0.00804	0.00763	0.00749	0.0071	0.00665	0.00602	0.00623	0.00481	0.00506	0.00328	0.00492	0.00275
47	0.01202	0.0119	0.01173	0.01085	0.01097	0.01014	0.01061	0.01026	0.00933	0.00906	0.00924	0.00897	0.00857	0.00799	0.00769	0.00746	0.00726	0.00629	0.00663	0.005	0.00561	0.00348	0.00544	0.00293
48	0.01287	0.01213	0.0126	0.01106	0.01151	0.01066	0.01142	0.01097	0.00992	0.00944	0.00987	0.00945	0.00916	0.00831	0.00804	0.00772	0.00778	0.00666	0.00707	0.00528	0.00616	0.00365	0.00601	0.00329
49	0.01328	0.01256	0.01309	0.01144	0.01181	0.01054	0.0117	0.01107	0.01024	0.00969	0.01035	0.00967	0.01	0.00895	0.00841	0.00793	0.0083	0.00698	0.00761	0.00553	0.00675	0.00391	0.0067	0.00355
50	0.0151	0.01445	0.01435	0.01274	0.01319	0.01192	0.01278	0.01197	0.01122	0.01048	0.01118	0.01025	0.01075	0.00956	0.00929	0.00852	0.00903	0.00743	0.00838	0.00589	0.00749	0.00422	0.00753	0.0039
51	0.01406	0.01289	0.01405	0.01226	0.01377	0.01231	0.0121	0.01114	0.01213	0.01117	0.01157	0.0105	0.01099	0.00993	0.00972	0.0088	0.00941	0.00754	0.0089	0.00584	0.0081	0.0043	0.00825	0.00417
52	0.01502	0.01424	0.01499	0.01308	0.01502	0.01367	0.01315	0.01185	0.0132	0.01209	0.01224	0.01091	0.0118	0.01047	0.01049	0.00946	0.01026	0.00809	0.00961	0.00622	0.00897	0.00468	0.00914	0.00453
53	0.0158	0.01431	0.01565	0.01376	0.01546	0.01411	0.01361	0.01278	0.01373	0.01244	0.01283	0.01151	0.01247	0.01099	0.01145	0.01012	0.01118	0.00842	0.01035	0.00646	0.00984	0.00495	0.0101	0.00492
54	0.01711	0.01529	0.01632	0.01431	0.01629	0.01486	0.01477	0.01316	0.0146	0.01331	0.0139	0.01237	0.01326	0.01158	0.01248	0.01054	0.01219	0.00902	0.01123	0.00679	0.01079	0.00526	0.01112	0.00537
55	0.01795	0.01663	0.0177	0.0159	0.01752	0.01631	0.01555	0.01373	0.01591	0.01402	0.01486	0.01293	0.0139	0.01216	0.01347	0.01111	0.01316	0.00932	0.01204	0.00707	0.01187	0.00572	0.01205	0.0057
56	0.01889	0.01684	0.01833	0.01602	0.01842	0.01668	0.01669	0.01467	0.01671	0.01495	0.01606	0.014	0.01487	0.01298	0.01475	0.01192	0.01425	0.01005	0.01298	0.00733	0.01302	0.00609	0.01317	0.0061
57	0.02011	0.01748	0.01934	0.01694	0.01926	0.01709	0.01769	0.01562	0.01779	0.01559	0.01731	0.01467	0.01585	0.01357	0.01595	0.01271	0.01536	0.01064	0.01419	0.00787	0.01447	0.00669	0.01436	0.00668
58	0.021	0.01884	0.02057	0.0184	0.02011	0.01879	0.01891	0.01671	0.01927	0.01701	0.01883	0.01591	0.01718	0.01466	0.01747	0.01386	0.01661	0.01132	0.01542	0.00842	0.01583	0.00719	0.01549	0.00721
59	0.02231	0.01967	0.02148	0.01922	0.02176	0.01959	0.01995	0.01774	0.02058	0.01804	0.02042	0.01697	0.01836	0.01565	0.01873	0.01468	0.01791	0.01205	0.01686	0.00898	0.01737	0.0079	0.01663	0.00777
60	0.02566	0.02385	0.02508	0.0228	0.02486	0.02258	0.02244	0.01987	0.02297	0.01992	0.02235	0.01862	0.02061	0.01737	0.02068	0.01604	0.01969	0.013	0.01853	0.00979	0.01917	0.00863	0.01805	0.00848
61	0.02551	0.0232	0.02537	0.02286	0.0237	0.02119	0.02426	0.02122	0.02411	0.02057	0.02366	0.01992	0.0219	0.01828	0.02175	0.01663	0.02056	0.01335	0.01986	0.01045	0.02076	0.00925	0.01934	0.00912
62	0.02802	0.02576	0.02867	0.02644	0.02642	0.02371	0.02674	0.0238	0.02604	0.02225	0.02543	0.0213	0.02443	0.02034	0.02412	0.01804	0.02246	0.01435	0.02172	0.01142	0.02285	0.0104	0.02099	0.00999
63	0.03004	0.02758	0.03044	0.02752	0.02879	0.02544	0.02889	0.02551	0.02811	0.02436	0.02773	0.02331	0.02692	0.02207	0.02654	0.02004	0.02447	0.01558	0.02365	0.01248	0.02539	0.01137	0.02257	0.01083
64	0.03259	0.02901	0.03286	0.03013	0.03098	0.02763	0.03113	0.02742	0.03082	0.02601	0.02975	0.02525	0.02925	0.0241	0.02887	0.02167	0.02621	0.01665	0.02578	0.01353	0.02754	0.0124	0.02412	0.01177
65	0.03608	0.03271	0.03654	0.03317	0.03382	0.03014	0.03454	0.03	0.03383	0.02865	0.03249	0.02738	0.03214	0.02615	0.03161	0.02352	0.02859	0.01808	0.02863	0.01478	0.03033	0.01364	0.02596	0.01284
66	0.03869	0.03418	0.03833	0.03467	0.03679	0.03288	0.0369	0.03209	0.03649	0.03106	0.03499	0.02959	0.03454	0.0285	0.03375	0.02511	0.03051	0.01927	0.03111	0.01612	0.0329	0.01506	0.02793	0.01404
67	0.04052	0.03746	0.04138	0.03778	0.03937	0.03515	0.03987	0.03487	0.04038	0.03417	0.03793	0.03215	0.03808	0.03091	0.03624	0.02686	0.03302	0.0211	0.03419	0.01782	0.03533	0.01637	0.02995	0.01518
68	0.04465	0.04059	0.04546	0.0416	0.04245	0.03802	0.04432	0.03803	0.04432	0.03781	0.04133	0.03528	0.04203	0.03422	0.03937	0.02951	0.03597	0.023	0.03723	0.01949	0.03805	0.01774	0.03206	0.01649
69	0.04773	0.04252	0.04837	0.04404	0.04575	0.04105	0.04736	0.04131	0.04834	0.04097	0.04542	0.038	0.04582	0.03709	0.04226	0.03191	0.03873	0.02498	0.04052	0.02128	0.04084	0.01931	0.03452	0.01805
70	0.05553	0.05001	0.05595	0.05111	0.05269	0.04662	0.05305	0.0464	0.05322	0.04576	0.05077	0.04327	0.05047	0.04086	0.04638	0.03497	0.04253	0.02757	0.04503	0.02372	0.04386	0.02121	0.03748	0.01998
71	0.05692	0.05178	0.05549	0.04984	0.0561	0.05047	0.05573	0.04826	0.05706	0.04816	0.05466	0.04617	0.05415	0.04344	0.04868	0.03667	0.04544	0.02956	0.04856	0.02556	0.04667	0.02288	0.03988	0.02144
72	0.0644	0.05861	0.06198	0.05628	0.06304	0.05657	0.06221	0.05387	0.06274	0.05326	0.06148	0.05168	0.05996	0.04812	0.05352	0.04031	0.04918	0.03263	0.05335	0.02847	0.05024	0.02526	0.0428	0.02349
73	0.0698	0.06326	0.06834	0.06184	0.0675	0.06096	0.06841	0.0596	0.06779	0.05891	0.06669	0.05678	0.065	0.05219	0.05808	0.04414	0.05361	0.03583	0.05856	0.03148	0.0536	0.02735	0.04635	0.02587
74	0.07636	0.06866	0.07464	0.06721	0.07412	0.06583	0.07442	0.06447	0.07412	0.06367	0.07292	0.06197	0.0707	0.05774	0.06254	0.04777	0.05943	0.03939	0.06318	0.03469	0.05738	0.02961	0.04988	0.02828
75	0.08478	0.07721	0.08202	0.07367	0.08184	0.07312	0.08178	0.07066	0.08105	0.06984	0.0809	0.06769	0.07772	0.06308	0.06804	0.05222	0.06487	0.04331	0.06862	0.03846	0.0616	0.03223	0.05379	0.03113
76	0.09037	0.08056	0.08868	0.08091	0.0893	0.07786	0.09092	0.07761	0.08769	0.07621	0.08791	0.07432	0.08334	0.06805	0.07393	0.05643	0.07105	0.0477	0.0742	0.04195	0.06637	0.03567	0.05792	0.0341
77	0.09711	0.08641	0.09601	0.0863	0.09681	0.08509	0.09888	0.08548	0.09496	0.08212	0.09562	0.08133	0.08938	0.07315	0.08035	0.06145	0.07742	0.05226	0.07924	0.04576	0.07142	0.0387	0.06259	0.03733
78	0.10665	0.09607	0.10484	0.09383	0.10568	0.09173	0.10905	0.09385	0.10379	0.08936	0.10494	0.08873	0.0971	0.07958	0.08728	0.0672	0.08494	0.05732	0.08541	0.05017	0.07643	0.04269	0.06793	0.04128
79	0.11478	0.10172	0.11321	0.10031	0.11365	0.0998	0.1171	0.10094	0.11159	0.09731	0.11288	0.09568	0.10469	0.08608	0.09432	0.07337	0.0924	0.06325	0.09142	0.05476	0.08257	0.04685	0.07339	0.04567
80	0.132	0.1161	0.12716	0.11233	0.12806	0.11299	0.13017	0.11225	0.12613	0.11006	0.12464	0.10621	0.11532	0.09594	0.10404	0.0816	0.10228	0.07094	0.09843	0.0606	0.08971	0.05245	0.08068	0.05124
81	0.13279	0.12001	0.13492	0.12221	0.1349	0.11792	0.13697	0.11923	0.13529	0.11674	0.13354	0.11425	0.12203	0.10005	0.11171	0.08724	0.11069	0.07711	0.10505	0.06554	0.09529	0.05699	0.08752	0.05668
82	0.14693	0.1312	0.1504	0.13311	0.14714	0.12803	0.14768	0.12975	0.14703	0.13036	0.14603	0.12456	0.13234	0.11009	0.12013	0.09592	0.12058	0.08427	0.11316	0.07197	0.10387	0.06311	0.09574	0.06362
83	0.16069	0.1405	0.15878	0.14063	0.15834	0.14034	0.15953	0.14027	0.1612	0.14007	0.15722	0.13402	0.14312	0.11857	0.13178	0.10553	0.13127	0.0923	0.12057	0.07826	0.11161	0.06918	0.10466	0.0721
84	0.17704	0.15228	0.17251	0.15259	0.17361	0.15011	0.17571	0.15391	0.17546	0.15311	0.17117	0.14579	0.15475	0.12816	0.14395	0.11557	0.14055	0.10208	0.12847	0.08536	0.12001	0.07664	0.11543	0.08064
85	0.18736	0.16347	0.18892	0.1642	0.18462	0.16409	0.18653	0.16216	0.18661	0.16359	0.18311	0.15656	0.16462	0.13883	0.15568	0.12605	0.15296	0.11207	0.13794	0.09251	0.13028	0.08487	0.12734	0.09084
PANEL C
Fraction of birthing events reported at parental age
Age	Fathers	Mothers	1800-through-1809 parental birth cohort
10	0.00022	0.00058
11	0.00027	0.00071
12	0.00034	0.00097
13	0.00044	0.00126
14	0.00057	0.0017
15	0.00082	0.00247
16	0.00106	0.00387
17	0.00152	0.00647
18	0.00235	0.01077
19	0.00377	0.01538
20	0.0065	0.02165
21	0.01023	0.0269
22	0.01427	0.03234
23	0.01917	0.03649
24	0.02423	0.04009
25	0.02929	0.04301
26	0.03315	0.04464
27	0.03629	0.04585
28	0.03898	0.04658
29	0.0407	0.04698
30	0.04261	0.04725
31	0.04304	0.04661
32	0.04357	0.0459
33	0.0436	0.04497
34	0.0432	0.04368
35	0.04259	0.04251
36	0.04174	0.04039
37	0.04028	0.03852
38	0.03903	0.03622
39	0.03719	0.03329
40	0.03589	0.03075
41	0.03352	0.02678
42	0.03112	0.02275
43	0.02836	0.01827
44	0.02564	0.0139
45	0.0229	0.00996
46	0.02	0.00677
47	0.01748	0.00447
48	0.01523	0.00307
49	0.01309	0.00222
50	0.01123	0.00173
51	0.00935	0.00136
52	0.00808	0.00116
53	0.00683	0.00094
54	0.00578	0.00079
55	0.00488	0.00069
56	0.00421	0.00055
57	0.00356	0.00047
58	0.00302	0.0004
59	0.00262	0.00037
60	0.00227	0.00031
61	0.00194	0.00027
62	0.00163	0.00021
63	0.00141	0.00018
64	0.00124	0.00017
65	0.00102	0.00014
66	0.00087	0.00012
67	0.00076	0.00012
68	0.00065	0.0001
69	0.00054	8e-05
70	0.00046	8e-05
PANEL D
Hazard doubling rate estimates:
Est. from ages 65-70		Est. from ages 75-80
Birth decade	Males	Females	Males	Females
1800	8.4204	8.4883	8.0206	8.5261
1810	8.3008	8.156	8.0519	8.5498
1820	8.2337	8.2953	7.9545	8.0989
1830	8.087	8.0234	7.627	7.5924
1840	7.58	7.4129	8.0255	7.8488
1850	7.8256	7.7471	8.076	7.8354
1860	7.5763	7.7693	8.8554	8.4098
1870	9.0704	8.676	8.2616	7.8042
1880	8.7073	8.1664	7.6828	7.1239
1890	7.7201	7.3755	9.6851	7.6685
1900	9.4482	8.0022	9.3238	7.2406
1910	9.558	7.9551	8.6089	6.9943
